# Supplementary material
Source: PubMed Central journal article supplement (PMC2862978)
Supplement: NIHMS196210-supplement-1_si_001.pdf [file NIHMS196210-supplement-1_si_001.pdf]

## Supporting Information

### Nature of Intermediates in Organo-SOMO Catalysis of $\alpha$ -Arylation of Aldehydes

Joann M. Um,<sup>†</sup> Osvaldo Gutierrez,<sup>†</sup> Franziska Schoenebeck,<sup>†</sup> K. N. Houk,<sup>†,\*</sup> and David W. C. MacMillan<sup>‡,\*</sup>

houk@chem.ucla.edu

dmacmill@princeton.edu

<sup>†</sup>*Department of Chemistry and Biochemistry, University of California, Los Angeles  
Los Angeles, California 90095-1569*

<sup>‡</sup>*Merck Center for Catalysis at Princeton University  
Princeton, New Jersey 08544*

#### Contents

|                                                                                                                                            |      |
|--------------------------------------------------------------------------------------------------------------------------------------------|------|
| Comparison of model radical cation <b>14*</b> with enamine <b>S1</b> , iminium <b>S2</b> , and unconjugated radical cation <b>S3</b> ..... | S-2  |
| Oxidation of radical cations <b>17*</b> and <b>18*</b> .....                                                                               | S-2  |
| Molecular Geometries and Energies.....                                                                                                     | S-3  |
| References, manuscript endnote 5.....                                                                                                      | S-32 |

## Comparison of 14\* with enamine S1, iminium S2, and unconjugated radical cation S3

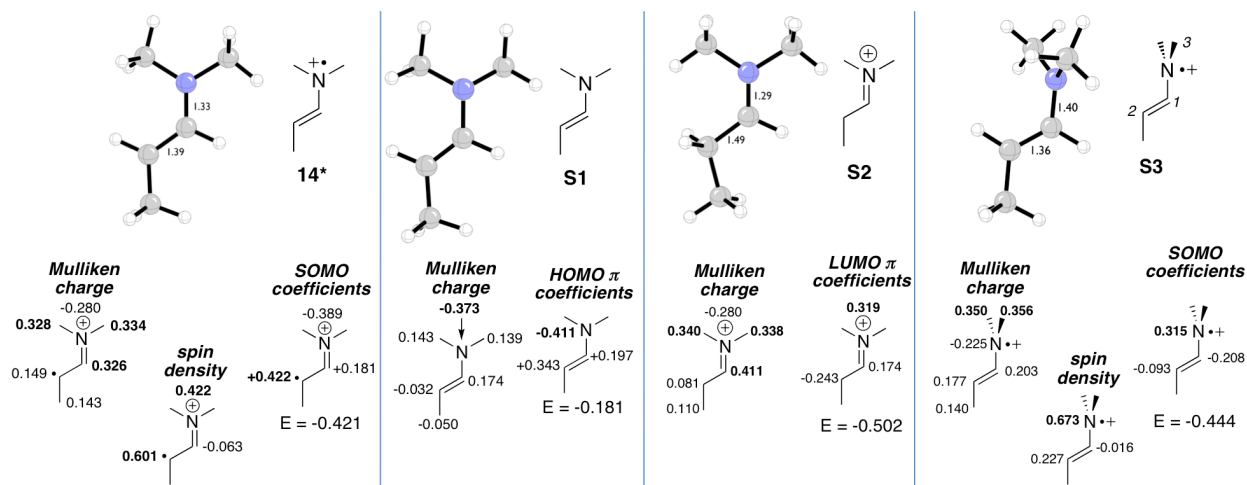

## Oxidation of cyclized radical cations 17\* and 18\*

To understand the feasibility of oxidizing **17\*** and **18\*** to generate a dication, the oxidation and internal reorganization free energies were calculated. Single point energies (in water) were calculated on the gas-phase optimized geometries using CPCM B3LYP/6-31+G(d). The free energies of solvation from the single point energy calculations were used to obtain the energies used in the calculation of the internal reorganization energy ( $\lambda_i$ ).

The Marcus equation allows the activation energy for the electron transfer to be calculated from the total reorganization energy (i.e., the total of the internal and solvent contributions) and the reaction free energy ( $\Delta G_{\text{rxn}}$ ). However, as a first approximation only the internal reorganization energies are used (eq. 1), as done elsewhere previously,<sup>1</sup> closely adopted to methodology successfully applied previously.<sup>2-4</sup>

$$\Delta G_{\text{activation}} = (\lambda_i/4)(1 + \Delta G_{\text{R}}/\lambda_i)^2 \quad (\text{eq. 1})$$

The following oxidations were calculated (see following page):

- (i) Oxidation of the neutral enamine **S-4** to the radical cation **16\***
- (ii) Oxidation of the radical cation **16\*** to the dication **S-5**
- (iii) Oxidation of the ring-closed radical cation **17\*** to the dication **S-6**
- (iv) Oxidation of the ring-closed radical cation **18\*** to the dication **S-7**

The four oxidations were considered in order to decide about their feasibility relative to each other. Since the oxidant is assumed to be identical in all three cases, it is neglected from this consideration. Only the half reactions for the oxidation of the organic compound are considered.

To calculate the internal reorganization energy ( $\lambda_i$ ), the following approach was taken, as discussed for Reaction (i):<sup>1</sup>

$$\lambda_i(1) = (E_{\text{N}}(\text{R}_c) - E_{\text{N}}(\text{R}_n)) + (E_{\text{C}}(\text{R}_n) - E_{\text{C}}(\text{R}_c))$$

$E_{\text{N}}(\text{R}_c)$ : energy of the neutral species in the geometry of the radical cation;

$E_{\text{N}}(\text{R}_n)$ : energy of the neutral species in its optimized geometry;

$E_{\text{C}}(\text{R}_n)$ : energy of the cationic species in the geometry of the neutral compound

$E_{\text{C}}(\text{R}_c)$ : energy of the cationic species in its optimized geometry.

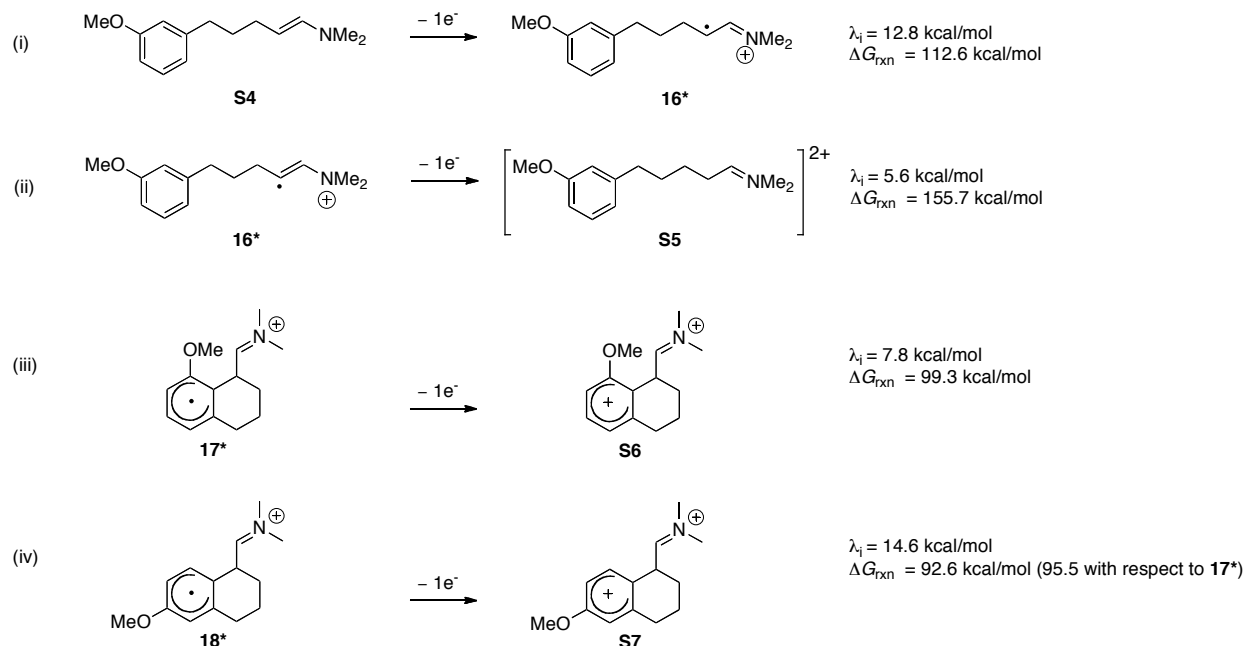

The free energies and reorganization energies of the half reactions shown in above suggest that oxidation of the intermediate radical cation  $\text{17}^*$  (and  $\text{18}^*$ ) should be, at least as feasible as oxidation of the enamine  $\text{S4}$ . Furthermore, based on the greater endergonicity of the oxidation of radical cation  $\text{16}^*$ , it is reasonable to exclude dication  $\text{S5}$  as intermediate. Direct comparison of the SOMO-energies of species  $\text{16}^*$  ( $E = -0.321$  hartree) with  $\text{17}^*$  ( $E = -0.278$  hartree) and  $\text{18}^*$  ( $E = -0.272$  hartree) are in line with an easier oxidation of  $\text{17}^*$  and  $\text{18}^*$ . The oxidation of  $\text{17}^*$  and  $\text{18}^*$  would be feasible with CAN ( $\text{Ce}^{4+} E^\circ = +1.7$  V).  $\text{S6}$  was calculated to be 3.8 kcal/mol destabilized with respect to  $\text{S7}$ .

Deprotonation of  $\text{S6/S7}$  would favor the more stable *ortho* iminium-aromatic product  $\text{S8}$ .

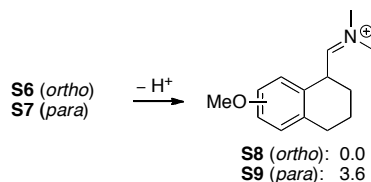

## References

- Murphy, J. A.; Zhou, S.-Z.; Thomson, D. W.; Schoenebeck, F.; Mohan, M.; Park, S. R.; Tuttle, T.; Berlouis, L. E. A. *Angew. Chem. Int. Ed.*, **2007**, *46*, 5178–5183.
- Rosokha, S. V.; Dibrov, S. M.; Rosokha, T. Y.; Kochi, J. K. *Photochem. Photobiol. Sci.* **2006**, *5*, 914–924.
- Rosokha, S. V.; Newton, M. D.; Head-Gordon, M. Kochi, J. K. *Chem. Phys.* **2006**, *324*, 117–128.
- Rosokha, S. V.; Lu, J. M.; Newton, M. D.; Kochi, J. K. *J. Am. Chem. Soc.* **2005**, *127*, 7411–7420.

## Molecular Geometries and Energies

Unless noted otherwise, all reported values are for the B3LYP/6-31G(d)-optimized geometries.

### **(E)-[N,N-dimethylamine] enamine radical cation of propanal, conjugated (14\*)**

Number of imaginary frequencies: 0  
<S<sup>2</sup>> = 0.76

|   |           |           |           |
|---|-----------|-----------|-----------|
| C | -1.427923 | 0.325939  | 0.000023  |
| H | -1.310964 | 1.406952  | 0.000096  |
| C | -0.295676 | -0.487528 | -0.000027 |
| H | -0.417686 | -1.567154 | -0.000054 |
| N | 0.966593  | -0.053337 | -0.000029 |
| C | 1.311509  | 1.378766  | -0.000008 |
| H | 0.908033  | 1.860717  | 0.895108  |
| H | 2.396211  | 1.477061  | -0.000542 |
| H | 0.907143  | 1.860971  | -0.894578 |
| C | 2.086351  | -1.002430 | 0.000023  |
| H | 1.712100  | -2.026086 | 0.000108  |
| H | 2.699813  | -0.832130 | -0.890778 |
| H | 2.699831  | -0.831993 | 0.890788  |
| C | -2.807732 | -0.213630 | 0.000000  |
| H | -3.358708 | 0.161955  | 0.874986  |
| H | -3.358720 | 0.162061  | -0.874933 |
| H | -2.842379 | -1.305695 | -0.000066 |

E (0 K) = -251.6339158  
E +ZPE (0 K) = -251.479474  
H (298 K) = -251.470374  
G (298 K) = -251.512245

### **(E)-[(2S, 5S)-2-tert-butyl-5-benzyl-3-methyl-imidazolidin-4-one] enamine radical cation of propanal (15-E\*)**

Number of imaginary frequencies: 0  
<S<sup>2</sup>> = 0.76

|   |           |           |           |
|---|-----------|-----------|-----------|
| C | -2.063449 | -0.355764 | 0.514050  |
| C | -0.105008 | 1.135942  | 0.493320  |
| H | -2.456344 | -0.851930 | 1.412950  |
| H | 0.478463  | 1.452364  | 1.363318  |
| C | 0.734319  | 1.408513  | -0.795280 |
| H | 0.749370  | 2.502627  | -0.862200 |
| N | -2.456861 | 1.046186  | 0.504273  |
| C | -3.824271 | 1.524897  | 0.700193  |
| H | -4.355501 | 0.864375  | 1.390701  |
| H | -3.759068 | 2.527542  | 1.126666  |
| H | -4.375960 | 1.585265  | -0.241886 |
| C | -1.414351 | 1.931130  | 0.474297  |
| O | -1.479238 | 3.142179  | 0.450375  |
| N | -0.580085 | -0.232372 | 0.712167  |

|   |           |           |           |
|---|-----------|-----------|-----------|
| C | 2.136673  | 0.858325  | -0.764480 |
| C | 2.450095  | -0.366331 | -1.380460 |
| C | 3.158122  | 1.561402  | -0.102595 |
| C | 3.749694  | -0.876131 | -1.335390 |
| H | 1.678333  | -0.908942 | -1.921703 |
| C | 4.453742  | 1.050095  | -0.051509 |
| H | 2.939787  | 2.523533  | 0.356103  |
| C | 4.751969  | -0.172449 | -0.666042 |
| H | 3.980215  | -1.813617 | -1.833119 |
| H | 5.236241  | 1.610719  | 0.451366  |
| H | 5.764938  | -0.562660 | -0.635516 |
| H | 0.183924  | 1.041772  | -1.664511 |
| C | 0.122959  | -1.207895 | 1.305747  |
| H | -0.433154 | -2.118414 | 1.503506  |
| C | 1.454398  | -1.138142 | 1.687337  |
| H | 2.010271  | -0.216070 | 1.552061  |
| C | 2.174405  | -2.284650 | 2.296619  |
| H | 2.569628  | -2.005365 | 3.283483  |
| H | 1.551602  | -3.176746 | 2.403105  |
| H | 3.052912  | -2.535029 | 1.684405  |
| C | -2.518058 | -1.214736 | -0.728492 |
| C | -4.046449 | -1.427918 | -0.616312 |
| H | -4.614531 | -0.510340 | -0.780339 |
| H | -4.363758 | -2.144036 | -1.380615 |
| H | -4.331620 | -1.842519 | 0.358117  |
| C | -2.190327 | -0.526488 | -2.063089 |
| H | -1.112895 | -0.498990 | -2.256369 |
| H | -2.646459 | -1.088110 | -2.884559 |
| H | -2.578862 | 0.495796  | -2.107650 |
| C | -1.854312 | -2.606828 | -0.690804 |
| H | -0.769134 | -2.562847 | -0.830571 |
| H | -2.071345 | -3.146039 | 0.240379  |
| H | -2.255456 | -3.214311 | -1.507862 |

E (0 K) = -886.059309  
E +ZPE (0 K) = -885.647204  
H (298 K) = -885.647204  
G (298 K) = -885.69814

**(Z)-[(2S, 5S)-2-tert-butyl-5-benzyl-3-methyl-imidazolidin-4-one] enamine radical cation of propanal (15-Z\*)**

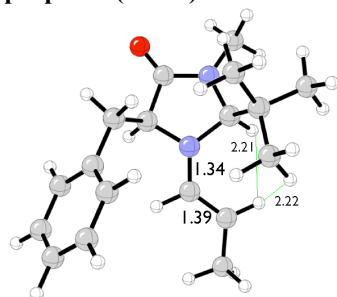

Number of imaginary frequencies: 0  
 $\langle S^2 \rangle = 0.76$

|   |           |           |          |
|---|-----------|-----------|----------|
| H | -1.060926 | -0.352111 | 2.351415 |
| H | -2.523763 | 0.284594  | 3.088893 |
| H | -2.639643 | -1.051804 | 1.942486 |
| C | -1.434201 | 2.167200  | 1.384633 |
| H | -0.362808 | 1.950024  | 1.441044 |
| H | -1.591634 | 2.991966  | 0.680747 |
| H | -1.740750 | 2.535968  | 2.368646 |

E (0 K) = -886.054429  
 E +ZPE (0 K) = -885.642505  
 H (298 K) = -885.619678  
 G (298 K) = -885.694368

|   |           |           |           |
|---|-----------|-----------|-----------|
| C | -1.894608 | 0.333587  | -0.382944 |
| C | -0.012456 | -1.225207 | -0.648903 |
| H | -2.299798 | 1.010003  | -1.146395 |
| H | 0.528436  | -1.419371 | -1.580616 |
| C | 0.891507  | -1.685919 | 0.528857  |
| H | 0.959139  | -2.772437 | 0.396364  |
| N | -2.352436 | -1.027240 | -0.633864 |
| C | -3.745495 | -1.402102 | -0.857173 |
| H | -4.243432 | -0.641206 | -1.465128 |
| H | -3.741806 | -2.353843 | -1.391428 |
| H | -4.293358 | -1.534146 | 0.080532  |
| C | -1.352386 | -1.959503 | -0.710436 |
| O | -1.475111 | -3.158735 | -0.844041 |
| N | -0.430737 | 0.185487  | -0.655141 |
| C | 2.259173  | -1.045090 | 0.525254  |
| C | 2.591902  | -0.056682 | 1.463658  |
| C | 3.219753  | -1.422112 | -0.428471 |
| C | 3.854976  | 0.538769  | 1.454654  |
| H | 1.868141  | 0.228463  | 2.224315  |
| C | 4.479053  | -0.824265 | -0.442450 |
| H | 2.989022  | -2.205307 | -1.148271 |
| C | 4.798991  | 0.159189  | 0.499347  |
| H | 4.103417  | 1.289882  | 2.198827  |
| H | 5.216525  | -1.135725 | -1.176407 |
| H | 5.783729  | 0.617007  | 0.494017  |
| H | 0.379909  | -1.512795 | 1.478267  |
| C | 0.388552  | 1.126583  | -1.143404 |
| H | 1.411618  | 0.788293  | -1.286669 |
| C | 0.054301  | 2.423997  | -1.507590 |
| H | -0.977407 | 2.755600  | -1.443644 |
| C | 1.054589  | 3.394187  | -2.018772 |
| H | 1.071296  | 4.290792  | -1.381971 |
| H | 2.064012  | 2.977965  | -2.064735 |
| H | 0.766310  | 3.746830  | -3.019367 |
| C | -2.278465 | 0.925177  | 1.039098  |
| C | -3.758658 | 1.368977  | 0.962878  |
| H | -4.446335 | 0.530286  | 0.835158  |
| H | -4.032268 | 1.871469  | 1.895866  |
| H | -3.929374 | 2.080719  | 0.146021  |
| C | -2.112388 | -0.118281 | 2.157998  |

**(E)-[N,N-dimethylamine] enamine radical cation  
of 5-(3-methoxyphenyl)-pentanal (16\*)**

Number of imaginary frequencies: 0  
<S<sup>2</sup>> = 0.76

|   |           |           |           |
|---|-----------|-----------|-----------|
| C | -1.987802 | -0.287804 | 1.342127  |
| H | -1.825733 | 0.204243  | 2.314368  |
| H | -2.241179 | -1.336869 | 1.536111  |
| C | -0.663460 | -0.198769 | 0.535701  |
| H | -0.429279 | 0.853567  | 0.330716  |
| H | -0.796038 | -0.693622 | -0.434262 |
| C | 0.506251  | -0.851863 | 1.299416  |
| H | 0.253197  | -1.899134 | 1.510429  |
| H | 0.624147  | -0.347963 | 2.267337  |
| C | 1.803414  | -0.785994 | 0.521346  |
| C | 2.130237  | -1.783313 | -0.413767 |
| C | 2.678813  | 0.287162  | 0.698011  |
| C | 3.311662  | -1.693021 | -1.145870 |
| H | 1.459768  | -2.629523 | -0.559394 |
| C | 3.868605  | 0.376763  | -0.040519 |
| H | 2.456022  | 1.073607  | 1.418201  |
| C | 4.191666  | -0.618526 | -0.970765 |
| H | 3.564747  | -2.470333 | -1.865784 |
| H | 5.107353  | -0.575679 | -1.552020 |
| O | 4.643480  | 1.472289  | 0.225410  |
| C | 5.867514  | 1.620407  | -0.487980 |
| H | 5.694706  | 1.699496  | -1.568760 |
| H | 6.315247  | 2.546975  | -0.123726 |
| H | 6.550171  | 0.784057  | -0.291593 |
| C | -3.101083 | 0.406252  | 0.648415  |
| H | -2.998655 | 1.480525  | 0.492230  |
| C | -4.226309 | -0.270701 | 0.181490  |
| H | -4.304706 | -1.348432 | 0.336382  |
| N | -5.250196 | 0.297337  | -0.455003 |
| C | -5.302167 | 1.738421  | -0.740023 |
| H | -6.254285 | 1.965386  | -1.219089 |
| H | -5.219778 | 2.304918  | 0.192068  |
| H | -4.482364 | 2.013349  | -1.411223 |
| C | -6.386599 | -0.505393 | -0.911754 |
| H | -7.300397 | -0.134420 | -0.434742 |
| H | -6.484735 | -0.398639 | -1.997642 |
| H | -6.229128 | -1.552897 | -0.652843 |

UB3LYP/6-31G(d)

E (0 K) = -675.917958  
E +ZPE (0 K) = -675.2692624  
H (268 K) = -675.577006  
G (268 K) = -675.635609  
H (298 K) = -675.573944  
G (298 K) = -675.642365

M06-2X/6-31+G(d)

E (0 K) = -675.603733  
E +ZPE (0 K) = -675.278399  
H (268 K) = -675.262781  
G (268 K) = -675.321384

**ortho-methoxy arylation (TS1)**

Number of imaginary frequencies: 1  
 $\langle S^2 \rangle = 0.77$

|   |           |           |           |
|---|-----------|-----------|-----------|
| C | -1.256948 | -2.337092 | -0.380536 |
| C | -0.236171 | -1.319998 | 0.135339  |
| C | -0.822524 | 0.325347  | -0.720845 |
| C | -2.166430 | 0.448913  | -0.180932 |
| C | -3.151279 | -0.614414 | -0.575840 |
| C | -2.705257 | -1.984997 | -0.017172 |
| H | -0.381020 | -1.064550 | 1.185500  |
| H | -1.148771 | -2.446295 | -1.468898 |
| H | -1.012571 | -3.314820 | 0.056699  |
| H | -4.152456 | -0.369018 | -0.204695 |
| H | -3.210056 | -0.678911 | -1.671958 |
| H | -2.811618 | -1.977280 | 1.075978  |
| H | -3.370913 | -2.768425 | -0.397936 |
| H | -0.748012 | -0.057236 | -1.741806 |
| C | 1.115661  | -1.530574 | -0.274887 |
| H | 1.291134  | -1.887227 | -1.291669 |
| C | 2.207680  | -0.848434 | 1.827396  |
| H | 2.244978  | 0.244397  | 1.893189  |
| H | 1.317289  | -1.213085 | 2.340141  |
| H | 3.092443  | -1.261101 | 2.318836  |
| C | 3.535127  | -1.370270 | -0.195197 |
| H | 4.027548  | -0.392318 | -0.153336 |
| H | 4.148429  | -2.096304 | 0.348340  |
| H | 3.434556  | -1.679541 | -1.236476 |
| N | 2.211424  | -1.281414 | 0.426883  |
| C | 0.110037  | 1.398753  | -0.425395 |
| C | -0.177608 | 2.351385  | 0.541140  |
| H | 0.536508  | 3.125455  | 0.806155  |
| C | -1.443621 | 2.342936  | 1.149885  |
| H | -1.671419 | 3.096149  | 1.902171  |
| C | -2.429029 | 1.409574  | 0.778802  |
| H | -3.416706 | 1.460211  | 1.235314  |
| O | 1.251543  | 1.328786  | -1.148231 |
| C | 2.232413  | 2.359800  | -0.983280 |
| H | 2.630593  | 2.368307  | 0.038087  |
| H | 3.029999  | 2.124544  | -1.689070 |
| H | 1.805437  | 3.341073  | -1.217766 |

UB3LYP/6-31G(d)

E (0 K) = -675.900021  
 E +ZPE (0 K) = -675.573395  
 H (268 K) = -675.559232  
 G (298 K) = -675.611328

M06-2X/6-31+G(d)

E (0 K) = -675.590768  
 E +ZPE (0 K) = -675.264141  
 H (268 K) = -675.249979  
 G (268 K) = -675.302075

**para-methoxy arylation (TS2)**

Number of imaginary frequencies: 1  
 $\langle S^2 \rangle = 0.77$

|   |           |           |           |
|---|-----------|-----------|-----------|
| C | -1.327773 | 2.376985  | 0.443096  |
| C | -1.289286 | 0.846780  | 0.349555  |
| C | -0.068646 | 0.483767  | -1.042957 |
| C | 1.138187  | 1.154437  | -0.563561 |
| C | 1.070812  | 2.647196  | -0.410464 |
| C | 0.046539  | 3.010706  | 0.688216  |
| H | -0.778676 | 0.387689  | 1.197996  |
| H | -1.773008 | 2.784518  | -0.475696 |
| H | -1.999022 | 2.655564  | 1.266543  |
| H | 2.054705  | 3.057168  | -0.156677 |
| H | 0.753661  | 3.105082  | -1.358521 |
| H | 0.433170  | 2.680311  | 1.661777  |
| H | -0.063737 | 4.100262  | 0.740521  |
| H | -0.605285 | 1.025789  | -1.827559 |
| C | -2.538038 | 0.248587  | -0.020070 |
| H | -3.188452 | 0.815537  | -0.689565 |
| C | -2.308913 | -1.905514 | 1.177756  |
| H | -1.329133 | -1.539442 | 1.474472  |
| H | -2.937329 | -2.037918 | 2.066353  |
| H | -2.192390 | -2.873370 | 0.680944  |
| C | -4.245675 | -1.456328 | -0.274350 |
| H | -4.079008 | -2.373795 | -0.848682 |
| H | -4.927079 | -1.676779 | 0.554753  |
| H | -4.689437 | -0.697010 | -0.919775 |
| N | -2.967315 | -0.973196 | 0.258458  |
| C | 0.041748  | -0.953597 | -1.259208 |
| C | 1.125333  | -1.660727 | -0.814510 |
| C | 2.218576  | -0.988014 | -0.205981 |
| C | 2.214986  | 0.418519  | -0.102385 |
| H | 3.068182  | 0.945909  | 0.315765  |
| H | -0.768025 | -1.472587 | -1.769230 |
| O | 3.224269  | -1.786768 | 0.210543  |
| C | 4.382211  | -1.196029 | 0.809756  |
| H | 4.893108  | -0.530412 | 0.104945  |
| H | 4.115478  | -0.641221 | 1.716353  |
| H | 5.036279  | -2.029898 | 1.067568  |
| H | 1.192679  | -2.739483 | -0.945207 |

UB3LYP/6-31G(d)

E (0 K) = -675.899104  
 E +ZPE (0 K) = -675.572395  
 H (268 K) = -675.558274  
 G (268 K) = -675.610537

M06-2X/6-31+G(d)

E (0 K) = -675.588269  
 E +ZPE (0 K) = -675.261560  
 H (268 K) = -675.247439  
 G (268 K) = -675.299702

**ortho-methoxy cyclized radical cation (17\*)**

Number of imaginary frequencies: 0  
 $\langle S^2 \rangle = 0.78$

|   |           |           |           |
|---|-----------|-----------|-----------|
| C | -0.198483 | -2.419210 | -0.338456 |
| C | 0.185670  | -0.961427 | 0.057111  |
| C | -0.856482 | 0.055216  | -0.595212 |
| C | -2.252200 | -0.340343 | -0.179478 |
| C | -2.646602 | -1.751170 | -0.512651 |
| C | -1.635892 | -2.753245 | 0.080881  |
| H | 0.113806  | -0.856141 | 1.145289  |
| H | -0.090121 | -2.533797 | -1.425988 |
| H | 0.504827  | -3.117639 | 0.130594  |
| H | -3.656327 | -1.964370 | -0.143880 |
| H | -2.664688 | -1.884435 | -1.607022 |
| H | -1.710213 | -2.740355 | 1.176329  |
| H | -1.874802 | -3.771515 | -0.248725 |
| H | -0.740535 | -0.086521 | -1.688581 |
| C | 1.553281  | -0.699456 | -0.446623 |
| H | 1.661859  | -0.596225 | -1.529157 |
| C | 2.775951  | -0.807179 | 1.689077  |
| H | 1.806637  | -0.996890 | 2.143858  |
| H | 3.450383  | -1.642717 | 1.898694  |
| H | 3.205415  | 0.110867  | 2.101730  |
| C | 3.949837  | -0.426296 | -0.446992 |
| H | 4.396251  | 0.492181  | -0.053718 |
| H | 4.616610  | -1.268215 | -0.239131 |
| H | 3.790709  | -0.333348 | -1.521867 |
| N | 2.661301  | -0.658912 | 0.229797  |
| C | -0.520798 | 1.479748  | -0.258480 |
| C | -1.362858 | 2.307583  | 0.436773  |
| H | -1.074412 | 3.327867  | 0.673347  |
| C | -2.640749 | 1.841276  | 0.836794  |
| H | -3.304763 | 2.506031  | 1.384008  |
| C | -3.055108 | 0.527687  | 0.516473  |
| H | -4.047989 | 0.196815  | 0.821943  |
| O | 0.718203  | 1.805151  | -0.720971 |
| C | 1.227231  | 3.114875  | -0.451747 |
| H | 1.296411  | 3.294440  | 0.627338  |
| H | 2.221219  | 3.149136  | -0.900085 |
| H | 0.588193  | 3.877653  | -0.910615 |

UB3LYP/6-31G(d)

E (0 K) = -675.906158  
 E +ZPE (0 K) = -675.578009  
 H (268 K) = -675.563841  
 G (268 K) = -675.616178  
 H (298 K) = -675.560897  
 G (298 K) = -675.622223

M06-2X/6-31+G(d)

E (0 K) = -675.601589  
 E +ZPE (0 K) = -675.273440  
 H (268 K) = -675.259272  
 G (268 K) = -675.311609

**para-methoxy cyclized radical cation (18\*)**

Number of imaginary frequencies: 0  
 $\langle S^2 \rangle = 0.78$

|   |           |           |           |
|---|-----------|-----------|-----------|
| C | -1.397539 | 2.316823  | 0.332480  |
| C | -1.255815 | 0.779096  | 0.226068  |
| C | -0.102644 | 0.433137  | -0.913017 |
| C | 1.144592  | 1.139479  | -0.474164 |
| C | 1.038500  | 2.632140  | -0.341143 |
| C | -0.066215 | 2.996616  | 0.673562  |
| H | -0.877325 | 0.375242  | 1.169959  |
| H | -1.781835 | 2.704928  | -0.621736 |
| H | -2.144103 | 2.556512  | 1.099292  |
| H | 1.997257  | 3.064146  | -0.032620 |
| H | 0.777853  | 3.073399  | -1.316325 |
| H | 0.253699  | 2.693759  | 1.679679  |
| H | -0.211292 | 4.083323  | 0.695575  |
| H | -0.507303 | 0.904061  | -1.824967 |
| C | -2.529014 | 0.175228  | -0.177924 |
| H | -3.093445 | 0.687145  | -0.962831 |
| C | -2.489970 | -1.814309 | 1.280028  |
| H | -1.505035 | -1.472271 | 1.586642  |
| H | -3.171385 | -1.813034 | 2.137329  |
| H | -2.413928 | -2.831477 | 0.885705  |
| C | -4.329051 | -1.432266 | -0.318807 |
| H | -4.172243 | -2.412230 | -0.779762 |
| H | -5.051897 | -1.530286 | 0.497018  |
| H | -4.701709 | -0.726674 | -1.062203 |
| N | -3.051196 | -0.949238 | 0.231298  |
| C | 0.080220  | -1.035279 | -1.106881 |
| C | 1.217051  | -1.683236 | -0.727839 |
| H | 1.319458  | -2.759752 | -0.858522 |
| C | 2.320470  | -0.968223 | -0.181803 |
| C | 2.263473  | 0.440554  | -0.080159 |
| H | 3.119032  | 1.000393  | 0.289761  |
| H | -0.730494 | -1.600112 | -1.565267 |
| O | 3.384035  | -1.731957 | 0.179488  |
| C | 4.544816  | -1.089747 | 0.708462  |
| H | 5.250275  | -1.891408 | 0.932565  |
| H | 4.987854  | -0.405520 | -0.024897 |
| H | 4.309406  | -0.539901 | 1.627445  |

UB3LYP/6-31G(d)

E (0 K) = -675.900555  
 E +ZPE (0 K) = -675.573026  
 H (268 K) = -675.558713  
 G (268 K) = -675.611563  
 H (298 K) = -675.555741  
 G (298 K) = -675.617668

M06-2X/6-31+G(d)

E (0 K) = -675.593675  
 E +ZPE (0 K) = -675.266146  
 H (268 K) = -675.251833  
 G (268 K) = -675.304683



**ortho-methoxy cyclohexadienyl cation (19\*)**  
CBS-QB3-optimized

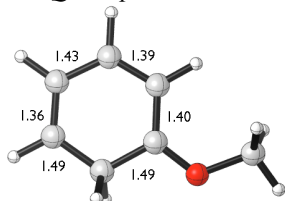

Number of imaginary frequencies: 0

|   |           |           |           |
|---|-----------|-----------|-----------|
| C | -1.281884 | 1.391033  | 0.000003  |
| C | -2.299331 | 0.386012  | -0.000009 |
| C | -1.939086 | -0.921983 | -0.000008 |
| C | 0.491502  | -0.225765 | 0.000003  |
| C | 0.076572  | 1.114475  | 0.000009  |
| H | -1.590228 | 2.433918  | 0.000004  |
| H | -3.341554 | 0.685668  | -0.000018 |
| H | -2.682998 | -1.713576 | -0.000012 |
| H | 0.795211  | 1.924786  | 0.000015  |
| C | -0.510892 | -1.332861 | 0.000010  |
| H | -0.310223 | -1.989050 | -0.864136 |
| H | -0.310247 | -1.989004 | 0.864198  |
| O | 1.726448  | -0.637065 | -0.000007 |
| C | 2.843210  | 0.297795  | -0.000005 |
| H | 2.808966  | 0.911882  | 0.902670  |
| H | 3.730008  | -0.332259 | -0.000035 |
| H | 2.808935  | 0.911924  | -0.902651 |

B3LYP/6-31G(d)

E (0 K) = -347.107802  
E +ZPE (0 K) = -346.962825  
H (298 K) = -346.954417  
G (298 K) = -346.994486

CBS-QB3

E (0 K) = -346.457556  
H (298 K) = -346.449043  
G (298 K) = -346.489323

**para-methoxy cyclohexadienyl cation (20\*)**  
CBS-QB3-optimized

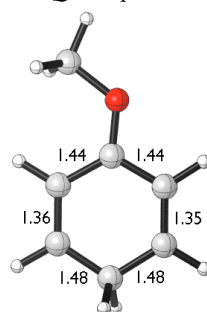

Number of imaginary frequencies: 0

|   |           |           |           |
|---|-----------|-----------|-----------|
| C | 0.500358  | -0.269085 | -0.000012 |
| C | 0.075430  | 1.102154  | -0.000029 |
| C | -1.253167 | 1.381191  | -0.000026 |
| C | -1.776138 | -1.069666 | -0.000010 |
| C | -0.450401 | -1.345314 | -0.000018 |
| H | 0.808984  | 1.899334  | -0.000059 |
| H | -1.587762 | 2.415420  | -0.000066 |
| H | -0.063215 | -2.358670 | -0.000034 |
| C | -2.289464 | 0.322078  | 0.000041  |
| H | -2.966617 | 0.471099  | -0.860998 |
| H | -2.966396 | 0.471059  | 0.861268  |
| H | -2.501748 | -1.878506 | -0.000016 |
| O | 1.746934  | -0.641655 | -0.000012 |
| C | 2.849643  | 0.308732  | 0.000034  |
| H | 2.809821  | 0.921661  | 0.903163  |
| H | 3.744082  | -0.310457 | -0.000004 |
| H | 2.809819  | 0.921761  | -0.903028 |

B3LYP/6-31G(d)

E (0 K) = -347.110979  
E +ZPE (0 K) = -346.965998  
H (298 K) = -346.957671  
G (298 K) = -346.997514

CBS-QB3

E (0 K) = -346.462400  
H (298 K) = -346.453972  
G (298 K) = -346.494006

**cyclohexadienyl cation (21\*)**  
CBS-QB3-optimized

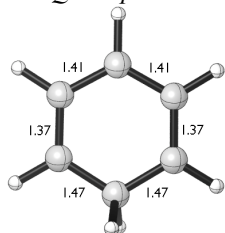

Number of imaginary frequencies: 0

|   |           |           |           |
|---|-----------|-----------|-----------|
| C | 1.412833  | 0.000327  | 0.000000  |
| C | 0.740274  | -1.238833 | 0.000000  |
| C | -0.627960 | -1.253102 | 0.000000  |
| C | -0.628542 | 1.252811  | 0.000000  |
| C | 0.739698  | 1.239176  | 0.000000  |
| H | 2.498638  | 0.000580  | 0.000000  |
| H | 1.309314  | -2.159850 | 0.000000  |
| H | -1.175992 | -2.189286 | -0.000001 |
| H | -1.177008 | 2.188742  | -0.000001 |
| H | 1.308313  | 2.160456  | 0.000000  |
| C | -1.395131 | -0.000324 | 0.000000  |
| H | -2.105149 | -0.000489 | 0.849933  |
| H | -2.105153 | -0.000489 | -0.849930 |

B3LYP/6-31G(d)

E (0 K) = -232.556295  
E +ZPE (0 K) = -232.445294  
H (298 K) = -232.439350  
G (298 K) = -232.473332

CBS-QB3

E (0 K) = -232.069295  
H (298 K) = -232.063278  
G (298 K) = -232.097379

**ortho-methoxy cyclohexadienyl radical (22\*)**  
CBS-QB3-optimized

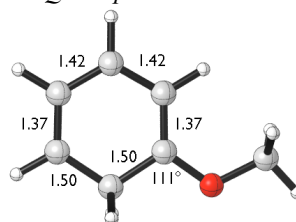

Number of imaginary frequencies: 0  
<S<sup>2</sup>> = 0.78

|   |           |           |           |
|---|-----------|-----------|-----------|
| C | -1.317604 | 1.414558  | 0.000005  |
| C | -2.287097 | 0.383438  | -0.000010 |
| C | -1.924231 | -0.935474 | -0.000012 |
| C | 0.477669  | -0.212528 | 0.000005  |
| C | 0.068145  | 1.093783  | -0.000016 |
| H | -1.623755 | 2.455674  | 0.000022  |
| H | -3.341698 | 0.649774  | 0.000002  |
| H | -2.678469 | -1.718003 | 0.000021  |
| H | 0.793837  | 1.900413  | -0.000009 |
| C | -0.484682 | -1.368214 | 0.000045  |
| H | -0.265819 | -2.016164 | -0.869454 |
| H | -0.265850 | -2.016091 | 0.869608  |
| O | 1.767832  | -0.646458 | -0.000108 |
| C | 2.800948  | 0.327625  | 0.000045  |
| H | 2.749921  | 0.962113  | 0.894425  |
| H | 3.740534  | -0.227825 | -0.000158 |
| H | 2.749749  | 0.962645  | -0.893967 |

UB3LYP/6-31G(d)

E (0 K) = -347.321217  
E +ZPE (0 K) = -347.178652  
H (298 K) = -347.170249  
G (298 K) = -347.210918

CBS-QB3

E (0 K) = -346.689579  
H (298 K) = -346.681069  
G (298 K) = -346.721933

**para-methoxy cyclohexadienyl radical (23\*)**  
CBS-QB3-optimized

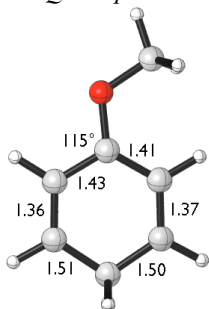

Number of imaginary frequencies: 0  
<S<sup>2</sup>> = 0.79

|   |           |           |           |
|---|-----------|-----------|-----------|
| C | 0.513012  | -0.267212 | -0.000074 |
| C | 0.069604  | 1.076149  | -0.000161 |
| C | -1.269078 | 1.376400  | -0.000060 |
| C | -1.778837 | -1.076799 | 0.000056  |
| C | -0.442833 | 1.326083  | -0.000013 |
| H | 0.791166  | 1.887328  | -0.000350 |
| H | -1.584397 | 2.416632  | -0.000215 |
| H | -0.062284 | -2.344200 | -0.000053 |
| C | -2.340320 | 0.320125  | 0.000145  |
| H | -3.015058 | 0.458652  | -0.867903 |
| H | -3.014725 | 0.458657  | 0.868455  |
| H | -2.483566 | -1.904746 | 0.000101  |
| O | 1.821599  | -0.664840 | -0.000290 |
| C | 2.827970  | 0.332719  | 0.000276  |
| H | 2.769299  | 0.966876  | 0.895279  |
| H | 3.780682  | -0.200553 | -0.000266 |
| H | 2.768974  | 0.968279  | -0.893739 |

UB3LYP/6-31G(d)

E (0 K) = -347.315831  
E +ZPE (0 K) = -347.173727  
H (298 K) = -347.165193  
G (298 K) = -347.206275

CBS-QB3

E (0 K) = -346.684009  
H (298 K) = -346.675351  
G (298 K) = -346.716696

**cyclohexadienyl radical (24\*)**  
CBS-QB3-optimized

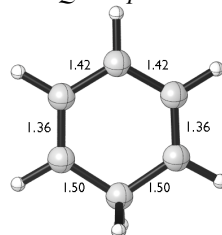

Number of imaginary frequencies: 0  
<S<sup>2</sup>> = 1.17

|   |           |           |           |
|---|-----------|-----------|-----------|
| C | -1.452929 | 0.000081  | 0.000004  |
| C | -0.739483 | 1.224541  | -0.000002 |
| C | 0.622827  | 1.254818  | -0.000004 |
| C | 0.622678  | -1.254904 | -0.000005 |
| C | -0.739649 | -1.224441 | -0.000002 |
| H | -2.535682 | 0.000156  | 0.000008  |
| H | -1.293801 | 2.157721  | -0.000006 |
| H | 1.149091  | 2.203547  | -0.000012 |
| H | 1.148826  | -2.203690 | -0.000013 |
| H | -1.294066 | -2.157562 | -0.000007 |
| C | 1.446294  | -0.000077 | 0.000007  |
| H | 2.133585  | -0.000141 | 0.865519  |
| H | 2.133617  | -0.000141 | -0.865478 |

UB3LYP/6-31G(d)

E (0 K) = -232.793385  
E +ZPE (0 K) = -232.684325  
H (298 K) = -232.678334  
G (298 K) = -232.713076

CBS-QB3

E (0 K) = -232.324076  
H (298 K) = -232.318016  
G (298 K) = -232.352879

**(E)-[N,N-dimethylamine] enamine radical cation  
of 5-(3,4-dimethoxyphenyl)-pentanal (25\*)**

Number of imaginary frequencies: 0  
<S<sup>2</sup>> = 0.76

|   |           |           |           |
|---|-----------|-----------|-----------|
| C | -2.627212 | 0.294684  | 1.395673  |
| H | -2.545393 | 1.170695  | 2.057938  |
| H | -2.851940 | -0.578808 | 2.019266  |
| C | -1.257092 | 0.103358  | 0.686623  |
| H | -1.048962 | 0.974401  | 0.052477  |
| H | -1.308342 | -0.770889 | 0.026330  |
| C | -0.114812 | -0.081976 | 1.707827  |
| H | -0.339626 | -0.950142 | 2.340186  |
| H | -0.086687 | 0.796237  | 2.367091  |
| C | 1.226489  | -0.273197 | 1.036029  |
| C | 1.747836  | -1.546012 | 0.809857  |
| C | 1.960055  | 0.844070  | 0.590542  |
| C | 2.975504  | -1.716516 | 0.155346  |
| H | 1.201266  | -2.425569 | 1.147483  |
| C | 3.180450  | 0.691970  | -0.061990 |
| H | 1.559213  | 1.837900  | 0.769178  |
| C | 3.699696  | -0.610640 | -0.285415 |
| H | 3.356642  | -2.721104 | 0.000240  |
| O | 3.956888  | 1.718458  | -0.520958 |
| C | 3.485597  | 3.048385  | -0.324610 |
| H | 3.374019  | 3.280380  | 0.742120  |
| H | 4.244870  | 3.700126  | -0.760943 |
| H | 2.526994  | 3.212785  | -0.832838 |
| C | -3.713899 | 0.541859  | 0.416545  |
| H | -3.654493 | 1.456785  | -0.173539 |
| C | -4.757416 | -0.358863 | 0.217531  |
| H | -4.796220 | -1.272404 | 0.813819  |
| N | -5.749952 | -0.199057 | -0.658767 |
| C | -5.845481 | 0.975546  | -1.536487 |
| H | -6.724066 | 0.866015  | -2.171987 |
| H | -5.944118 | 1.883726  | -0.933706 |
| H | -4.950925 | 1.046144  | -2.162482 |
| C | -6.810538 | -1.201107 | -0.780082 |
| H | -7.775308 | -0.729459 | -0.563059 |
| H | -6.825644 | -1.583567 | -1.806540 |
| H | -6.630491 | -2.018387 | -0.080861 |
| O | 4.903365  | -0.663180 | -0.928777 |
| C | 5.467449  | -1.947821 | -1.176279 |
| H | 4.813691  | -2.555947 | -1.814217 |
| H | 6.411134  | -1.763708 | -1.693112 |
| H | 5.662273  | -2.486480 | -0.240263 |

UB3LYP/6-31G(d)

E (0 K) = -790.436961  
E +ZPE (0 K) = -790.078535  
H (268 K) = -790.060808  
G (268 K) = -790.123717

M06-2X/6-31+G(d)

E (0 K) = -790.082538  
E +ZPE (0 K) = -789.724112  
H (268 K) = -789.706385  
G (268 K) = -789.769294

**TS3 (*ortho, meta* dimethoxy)**

Number of imaginary frequencies: 1  
<S<sup>2</sup>> = 0.78

|   |           |           |           |
|---|-----------|-----------|-----------|
| C | -3.060264 | 0.754356  | -0.075946 |
| C | -1.557291 | 0.833448  | -0.357684 |
| C | -0.803458 | -0.465131 | 0.822121  |
| C | -1.480560 | -1.674497 | 0.361503  |
| C | -2.969908 | -1.731871 | 0.548509  |
| C | -3.651987 | -0.641766 | -0.309386 |
| H | -1.280567 | 0.409641  | -1.323774 |
| H | -3.254710 | 1.085349  | 0.954149  |
| H | -3.571024 | 1.469738  | -0.734887 |
| H | -3.353872 | -2.719575 | 0.269469  |
| H | -3.223800 | -1.564880 | 1.605292  |
| H | -3.547842 | -0.905853 | -1.370376 |
| H | -4.725804 | -0.617761 | -0.089168 |
| H | -1.182493 | -0.035810 | 1.753324  |
| C | -0.942126 | 2.086521  | -0.034638 |
| H | -1.331756 | 2.636136  | 0.824706  |
| C | 0.808980  | 2.061985  | -1.769196 |
| H | 1.652940  | 1.453368  | -1.427113 |
| H | 0.132960  | 1.449303  | -2.365411 |
| H | 1.185179  | 2.880642  | -2.387999 |
| C | 0.751725  | 3.815244  | -0.030571 |
| H | 1.753089  | 3.544185  | 0.322314  |
| H | 0.839787  | 4.598268  | -0.789790 |
| H | 0.158829  | 4.180553  | 0.809081  |
| N | 0.109059  | 2.635507  | -0.615693 |
| C | 0.642802  | -0.430516 | 0.729774  |
| C | 1.320938  | -1.340524 | -0.093642 |
| C | 0.613488  | -2.430850 | -0.623563 |
| H | 1.122629  | -3.166150 | -1.238485 |
| C | -0.766587 | -2.595744 | -0.370158 |
| H | -1.268557 | -3.475594 | -0.770950 |
| O | 1.212979  | 0.620002  | 1.375187  |
| C | 2.502829  | 0.475792  | 2.002661  |
| H | 3.310976  | 0.550742  | 1.274361  |
| H | 2.561783  | 1.293775  | 2.723515  |
| H | 2.565508  | -0.483759 | 2.525554  |
| O | 2.645707  | -1.095877 | -0.319899 |
| C | 3.414565  | -2.089137 | -0.998277 |
| H | 3.066624  | -2.227114 | -2.029030 |
| H | 4.438450  | -1.712293 | -1.008509 |
| H | 3.379905  | -3.048319 | -0.467773 |

UB3LYP/6-31G(d)

E (0 K) = -790.413614  
E +ZPE (0 K) = -790.054449  
H (268 K) = -790.037966  
G (268 K) = -790.095127

M06-2X/6-31+G(d)

E (0 K) = -790.064330  
E +ZPE (0 K) = -789.705165  
H (268 K) = -789.688682  
G (268 K) = -789.745843

**TS4 (*para, meta* dimethoxy)**

Number of imaginary frequencies: 1  
<S<sup>2</sup>> = 0.77

|   |           |           |           |
|---|-----------|-----------|-----------|
| C | -1.887643 | 2.563777  | 0.095249  |
| C | -1.582754 | 1.072360  | 0.274969  |
| C | -0.252717 | 0.696046  | -1.025765 |
| C | 0.791413  | 1.634350  | -0.633866 |
| C | 0.475576  | 3.099961  | -0.724542 |
| C | -0.655464 | 3.459289  | 0.265179  |
| H | -1.039855 | 0.862992  | 1.198036  |
| H | -2.341042 | 2.725304  | -0.893151 |
| H | -2.643152 | 2.854869  | 0.837349  |
| H | 1.365838  | 3.701848  | -0.510535 |
| H | 0.146428  | 3.346341  | -1.744411 |
| H | -0.276159 | 3.367174  | 1.291914  |
| H | -0.947190 | 4.506699  | 0.124298  |
| H | -0.839454 | 1.010315  | -1.893815 |
| C | -2.683526 | 0.203252  | -0.007703 |
| H | -3.377610 | 0.508050  | -0.794045 |
| C | -2.180699 | -1.587687 | 1.619707  |
| H | -1.231518 | -1.081339 | 1.778054  |
| H | -2.791795 | -1.517931 | 2.527799  |
| H | -1.990611 | -2.643555 | 1.407243  |
| C | -4.065744 | -1.790755 | 0.044547  |
| H | -3.724160 | -2.766669 | -0.316098 |
| H | -4.752997 | -1.945539 | 0.883831  |
| H | -4.584027 | -1.266014 | -0.759294 |
| N | -2.913817 | -1.001316 | 0.493669  |
| C | 0.100328  | -0.717863 | -1.026986 |
| C | 1.269158  | -1.160112 | -0.462690 |
| C | 2.206517  | -0.209107 | 0.079745  |
| C | 1.949709  | 1.165630  | -0.034411 |
| H | 2.679433  | 1.885525  | 0.325679  |
| H | -0.590999 | -1.414646 | -1.489215 |
| O | 3.306496  | -0.746886 | 0.640826  |
| C | 4.303290  | 0.127631  | 1.181566  |
| H | 4.728177  | 0.768047  | 0.400594  |
| H | 3.887512  | 0.746601  | 1.984505  |
| H | 5.077735  | -0.526925 | 1.583120  |
| O | 1.679943  | -2.453279 | -0.391426 |
| C | 0.847131  | -3.449483 | -0.980966 |
| H | 1.367322  | -4.396976 | -0.833047 |
| H | -0.133346 | -3.491110 | -0.490430 |
| H | 0.709231  | -3.266261 | -2.053460 |

UB3LYP/6-31G(d)

E (0 K) = -790.418207  
E +ZPE (0 K) = -790.058528  
H (268 K) = -790.042231  
G (268 K) = -790.099037

M06-2X/6-31+G(d)

E (0 K) = -790.068747  
E +ZPE (0 K) = -789.709068  
H (298 K) = -789.692771  
G (298 K) = -789.749577

***Ortho,meta* dimethoxy cyclized radical cation  
(26\*)**

Number of imaginary frequencies: 0  
<S<sup>2</sup>> = 0.78

|   |           |           |           |
|---|-----------|-----------|-----------|
| C | -2.286158 | 1.906708  | -0.138460 |
| C | -1.378997 | 0.673100  | 0.142846  |
| C | -0.002743 | 0.834136  | -0.663917 |
| C | 0.621655  | 2.150630  | -0.285428 |
| C | -0.234908 | 3.366207  | -0.501486 |
| C | -1.581879 | 3.217514  | 0.234542  |
| H | -1.130369 | 0.643464  | 1.208462  |
| H | -2.555146 | 1.916391  | -1.204018 |
| H | -3.219417 | 1.804613  | 0.428242  |
| H | 0.287513  | 4.268236  | -0.162986 |
| H | -0.439492 | 3.493279  | -1.577171 |
| H | -1.409718 | 3.244630  | 1.318698  |
| H | -2.241234 | 4.058944  | -0.010108 |
| H | -0.309147 | 0.862840  | -1.728104 |
| C | -2.095265 | -0.541223 | -0.306327 |
| H | -2.301481 | -0.615598 | -1.377228 |
| C | -2.404634 | -1.627451 | 1.877968  |
| H | -2.112738 | -0.677964 | 2.321245  |
| H | -3.358483 | -1.948993 | 2.303476  |
| H | -1.642936 | -2.386037 | 2.085153  |
| C | -3.246794 | -2.655284 | -0.202965 |
| H | -2.673006 | -3.562227 | 0.012169  |
| H | -4.248789 | -2.751305 | 0.224524  |
| H | -3.313409 | -2.504323 | -1.280930 |
| N | -2.567417 | -1.506298 | 0.420342  |
| C | 0.894319  | -0.348749 | -0.465939 |
| C | 2.127812  | -0.255562 | 0.163041  |
| C | 2.630546  | 1.013333  | 0.524538  |
| H | 3.599401  | 1.107790  | 1.002175  |
| C | 1.863096  | 2.184129  | 0.283472  |
| H | 2.291236  | 3.145566  | 0.568036  |
| O | 0.300438  | -1.510144 | -0.875053 |
| C | 1.062925  | -2.499922 | -1.588242 |
| H | 1.680370  | -3.088256 | -0.907967 |
| H | 0.326757  | -3.138113 | -2.082152 |
| H | 1.698824  | -2.019969 | -2.339785 |
| O | 2.794460  | -1.430464 | 0.399142  |
| C | 4.157247  | -1.363499 | 0.811595  |
| H | 4.254429  | -0.920833 | 1.810655  |
| H | 4.507939  | -2.396850 | 0.841387  |
| H | 4.764288  | -0.790751 | 0.099686  |

UB3LYP/6-31G(d)

E (0 K) = -790.417453  
E +ZPE (0 K) = -790.057381  
H (268 K) = -790.040451  
G (268 K) = -790.100331

M06-2X/6-31+G(d)

E (0 K) = -790.072030  
E +ZPE (0 K) = -789.711958  
H (268 K) = -789.695028  
G (268 K) = -789.754908

***para* dimethoxy cyclized radical cation (27\*)**

Number of imaginary frequencies: 0  
<S<sup>2</sup>> = 0.77

|   |           |           |           |
|---|-----------|-----------|-----------|
| C | -1.897169 | 2.495906  | 0.028969  |
| C | -1.513146 | 1.000061  | 0.156604  |
| C | -0.281880 | 0.675486  | -0.892381 |
| C | 0.821037  | 1.624858  | -0.541109 |
| C | 0.489966  | 3.087731  | -0.622510 |
| C | -0.702871 | 3.417822  | 0.299623  |
| H | -1.120780 | 0.803499  | 1.158680  |
| H | -2.289061 | 2.677340  | -0.982057 |
| H | -2.708364 | 2.720351  | 0.732037  |
| H | 1.359749  | 3.697468  | -0.352623 |
| H | 0.215156  | 3.349489  | -1.656827 |
| H | -0.389665 | 3.315280  | 1.347275  |
| H | -1.011737 | 4.460146  | 0.155919  |
| H | -0.709831 | 0.942756  | -1.873815 |
| C | -2.665641 | 0.155429  | -0.174299 |
| H | -3.237750 | 0.427787  | -1.066470 |
| C | -2.479182 | -1.487755 | 1.654912  |
| H | -1.545690 | -0.990519 | 1.904739  |
| H | -3.196658 | -1.373107 | 2.474349  |
| H | -2.293437 | -2.553268 | 1.494070  |
| C | -4.245743 | -1.670095 | -0.058393 |
| H | -3.948089 | -2.694693 | -0.300927 |
| H | -5.001629 | -1.693661 | 0.732665  |
| H | -4.650980 | -1.180264 | -0.944553 |
| N | -3.070119 | -0.927783 | 0.429274  |
| C | 0.122819  | -0.762655 | -0.877988 |
| C | 1.332935  | -1.175041 | -0.401852 |
| C | 2.301099  | -0.211761 | 0.069797  |
| C | 2.016018  | 1.161943  | -0.033531 |
| H | 2.762312  | 1.890341  | 0.273375  |
| H | -0.580254 | -1.481319 | -1.286405 |
| O | 3.450159  | -0.736317 | 0.560931  |
| C | 4.459350  | 0.158994  | 1.031765  |
| H | 4.823893  | 0.804420  | 0.223961  |
| H | 4.085576  | 0.777601  | 1.856239  |
| H | 5.272167  | -0.475529 | 1.388282  |
| O | 1.765849  | -2.465867 | -0.346607 |
| C | 0.890577  | -3.479583 | -0.830911 |
| H | 1.427146  | -4.421681 | -0.706877 |
| H | -0.041163 | -3.511317 | -0.251742 |
| H | 0.652847  | -3.327206 | -1.890980 |

UB3LYP/6-31G(d)

E (0 K) = -790.420027  
E +ZPE (0 K) = -790.059301  
H (268 K) = -790.042855  
G (268 K) = -790.100186

M06-2X/6-31+G(d)

E (0 K) = -790.074894  
E +ZPE (0 K) = -789.714168  
H (268 K) = -789.697722  
G (268 K) = -789.755053



**(E)-[N,N-dimethylamine] enamine radical cation  
of 5-(3-methoxy-4-methyl-phenyl)-pentanal (28\*)**

Number of imaginary frequencies: 0  
<S<sup>2</sup>> = 0.76

|   |           |           |           |
|---|-----------|-----------|-----------|
| C | -2.250935 | 0.206077  | 1.368028  |
| H | -2.103862 | 1.028032  | 2.086441  |
| H | -2.498600 | -0.697098 | 1.938470  |
| C | -0.917326 | -0.000337 | 0.598287  |
| H | -0.677659 | 0.907695  | 0.030594  |
| H | -1.040333 | -0.811818 | -0.129421 |
| C | 0.241269  | -0.335561 | 1.559921  |
| H | -0.018761 | -1.237543 | 2.128827  |
| H | 0.347540  | 0.481946  | 2.285403  |
| C | 1.548023  | -0.552116 | 0.827680  |
| C | 1.923747  | -1.823456 | 0.385934  |
| C | 2.389997  | 0.538143  | 0.550747  |
| C | 3.118960  | -1.997839 | -0.319431 |
| H | 1.286435  | -2.681953 | 0.594684  |
| C | 3.583295  | 0.354155  | -0.153448 |
| H | 2.099455  | 1.525149  | 0.899612  |
| C | 3.968613  | -0.928354 | -0.604076 |
| H | 3.402975  | -2.995160 | -0.655144 |
| O | 4.458240  | 1.362818  | -0.454133 |
| C | 4.142104  | 2.683879  | -0.029294 |
| H | 4.063236  | 2.746373  | 1.063551  |
| H | 4.967272  | 3.312523  | -0.369609 |
| H | 3.205426  | 3.037376  | -0.478885 |
| C | -3.360229 | 0.574984  | 0.454207  |
| H | -3.269582 | 1.517121  | -0.087068 |
| C | -4.467376 | -0.248340 | 0.257689  |
| H | -4.533389 | -1.193219 | 0.800347  |
| N | -5.488519 | 0.023150  | -0.555123 |
| C | -5.556131 | 1.254161  | -1.355226 |
| H | -6.496587 | 1.261307  | -1.905836 |
| H | -5.512986 | 2.127832  | -0.698245 |
| H | -4.720805 | 1.283994  | -2.061817 |
| C | -6.606580 | -0.912642 | -0.691238 |
| H | -7.532855 | -0.408739 | -0.394117 |
| H | -6.689836 | -1.218670 | -1.739856 |
| H | -6.438159 | -1.786024 | -0.060397 |
| C | 5.260706  | -1.112426 | -1.359128 |
| H | 5.278390  | -0.512343 | -2.277377 |
| H | 6.123723  | -0.791024 | -0.762849 |
| H | 5.403852  | -2.162328 | -1.632307 |

UB3LYP/6-31G(d)

E (0 K) = -715.235140  
E +ZPE (0 K) = -714.881872  
H (268 K) = -714.864816  
G (268 K) = -714.926281

M06-2X/6-31+G(d)

E (0 K) = -714.901664  
E +ZPE (0 K) = -714.548396  
H (268 K) = -714.531340  
G (268 K) = -714.592805

**TS5 (ortho, meta 3-methoxy-4-methyl)**

Number of imaginary frequencies: 1  
<S<sup>2</sup>> = 0.78

|   |           |           |           |
|---|-----------|-----------|-----------|
| C | 1.270736  | -2.492888 | 0.012509  |
| C | 0.271260  | -1.382666 | -0.342988 |
| C | 0.814579  | 0.068156  | 0.711486  |
| C | 2.180659  | 0.272915  | 0.220073  |
| C | 3.161913  | -0.830059 | 0.493742  |
| C | 2.729564  | -2.107937 | -0.261617 |
| H | 0.433247  | -0.983141 | -1.345812 |
| H | 1.140583  | -2.773534 | 1.067449  |
| H | 1.021358  | -3.382733 | -0.580673 |
| H | 4.170378  | -0.535359 | 0.182992  |
| H | 3.195602  | -1.046130 | 1.571440  |
| H | 2.864980  | -1.947720 | -1.339698 |
| H | 3.380850  | -2.942805 | 0.022793  |
| H | 0.769087  | -0.423115 | 1.686568  |
| C | -1.09464  | -1.705576 | -0.033489 |
| H | -1.277930 | -2.332394 | 0.842621  |
| C | -2.204430 | -0.450548 | -1.851893 |
| H | -1.210107 | -0.356210 | -2.283453 |
| H | -2.877544 | -0.898918 | -2.589229 |
| H | -2.583494 | 0.540824  | -1.582276 |
| C | -3.514808 | -1.605589 | -0.120319 |
| H | -4.006381 | -0.675021 | 0.185639  |
| H | -4.117700 | -2.087553 | -0.896263 |
| H | -3.423506 | -2.271817 | 0.738808  |
| N | -2.185701 | -1.297138 | -0.657388 |
| C | -0.109898 | 1.182590  | 0.532996  |
| C | 0.168227  | 2.237770  | -0.332607 |
| C | 1.446717  | 2.287998  | -0.915386 |
| C | 2.440962  | 1.331547  | -0.621292 |
| H | 3.435288  | 1.447729  | -1.051312 |
| H | 1.687395  | 3.118674  | -1.577495 |
| C | -0.852546 | 3.321653  | -0.578514 |
| H | -1.196038 | 3.764308  | 0.363047  |
| H | -0.430693 | 4.115541  | -1.201481 |
| H | -1.744484 | 2.931628  | -1.084740 |
| O | -1.345863 | 1.158688  | 1.107673  |
| C | -1.472547 | 0.679171  | 2.456103  |
| H | -2.485909 | 0.940541  | 2.765553  |
| H | -1.345687 | -0.406381 | 2.522600  |
| H | -0.746957 | 1.174812  | 3.110432  |

UB3LYP/6-31G(d)

E (0 K) = -715.211548  
E +ZPE (0 K) = -714.857072  
H (268 K) = -714.841487  
G (268 K) = -714.896396

M06-2X/6-31+G(d)

E (0 K) = -714.884772  
E +ZPE (0 K) = -714.530296  
H (268 K) = -714.514711  
G (268 K) = -714.569620

**TS6 (*para, meta* 3-methoxy-4-methyl)**

Number of imaginary frequencies:1  
<S<sup>2</sup>> = 0.77

|   |           |           |           |
|---|-----------|-----------|-----------|
| C | -1.681398 | 2.458293  | 0.284014  |
| C | -1.477234 | 0.938901  | 0.312039  |
| C | -0.192264 | 0.608521  | -1.028931 |
| C | 0.923006  | 1.434968  | -0.579427 |
| C | 0.702115  | 2.919785  | -0.530956 |
| C | -0.389048 | 3.251815  | 0.511996  |
| H | -0.940894 | 0.604927  | 1.201734  |
| H | -2.136998 | 2.745050  | -0.674424 |
| H | -2.404124 | 2.725245  | 1.066658  |
| H | 1.631788  | 3.443049  | -0.281065 |
| H | 0.373089  | 3.279338  | -1.516738 |
| H | -0.001447 | 3.036019  | 1.516809  |
| H | -0.613971 | 4.324370  | 0.478879  |
| H | -0.764890 | 1.033678  | -1.858723 |
| C | -2.643972 | 0.179607  | -0.025902 |
| H | -3.336971 | 0.613914  | -0.749652 |
| C | -2.208731 | -1.826970 | 1.355964  |
| H | -1.265060 | -1.348836 | 1.606985  |
| H | -2.825185 | -1.920366 | 2.258045  |
| H | -2.008598 | -2.828076 | 0.962673  |
| C | -4.150017 | -1.719633 | -0.154241 |
| H | -3.875458 | -2.661880 | -0.640235 |
| H | -4.823196 | -1.936627 | 0.682654  |
| H | -4.656935 | -1.073037 | -0.871940 |
| N | -2.941865 | -1.056836 | 0.347627  |
| C | 0.072361  | -0.819121 | -1.145128 |
| C | 1.208556  | -1.406317 | -0.649029 |
| C | 2.206136  | -0.561251 | -0.065003 |
| C | 2.055245  | 0.839554  | -0.054828 |
| H | 2.842411  | 1.474070  | 0.343150  |
| H | -0.674336 | -1.442542 | -1.635335 |
| C | 1.451386  | -2.891723 | -0.733935 |
| H | 2.373478  | -3.113144 | -1.283845 |
| H | 1.568593  | -3.331325 | 0.263813  |
| H | 0.618465  | -3.391289 | -1.237003 |
| O | 3.283431  | -1.209809 | 0.426437  |
| C | 4.350394  | -0.456455 | 1.010034  |
| H | 3.996131  | 0.125308  | 1.868521  |
| H | 5.082357  | -1.194092 | 1.341382  |
| H | 4.808142  | 0.212708  | 0.272770  |

UB3LYP/6-31G(d)

E (0 K) = -715.216837  
E +ZPE (0 K) = -714.862251  
H (268 K) = -714.846710  
G (268 K) = -714.901820

M06-2X/6-31+G(d)

E (0 K) = -714.886653  
E +ZPE (0 K) = -714.532067  
H (268 K) = -714.516526  
G (268 K) = -714.571636

**Ortho, meta 3-methoxy-4-methyl cyclized radical cation (29\*)**

Number of imaginary frequencies: 0  
<S<sup>2</sup>> = 0.78

|   |           |           |           |
|---|-----------|-----------|-----------|
| C | -0.473814 | 2.609537  | -0.300798 |
| C | -0.511765 | 1.108140  | 0.113444  |
| C | 0.701453  | 0.337089  | -0.579585 |
| C | 1.986762  | 1.033503  | -0.217137 |
| C | 2.056396  | 2.492888  | -0.565318 |
| C | 0.870375  | 3.254849  | 0.062227  |
| H | -0.373858 | 1.032215  | 1.196888  |
| H | -0.644784 | 2.685591  | -1.383741 |
| H | -1.295073 | 3.141814  | 0.193875  |
| H | 3.006711  | 2.924375  | -0.230820 |
| H | 2.009884  | 2.617656  | -1.659574 |
| H | 0.985167  | 3.272115  | 1.154088  |
| H | 0.868743  | 4.296930  | -0.279302 |
| H | 0.518981  | 0.450972  | -1.668158 |
| C | -1.802630 | 0.537743  | -0.335459 |
| H | -1.958655 | 0.489615  | -1.416622 |
| C | -2.854873 | 0.165487  | 1.858329  |
| H | -1.953802 | 0.605433  | 2.278511  |
| H | -3.729222 | 0.735740  | 2.184619  |
| H | -2.953486 | -0.870251 | 2.198056  |
| C | -4.044937 | -0.341605 | -0.241300 |
| H | -4.188294 | -1.382711 | 0.064421  |
| H | -4.895845 | 0.255396  | 0.098797  |
| H | -3.958437 | -0.280014 | -1.326697 |
| N | -2.816612 | 0.174378  | 0.387951  |
| C | 0.684620  | -1.119195 | -0.221928 |
| C | 1.684604  | -1.754596 | 0.469596  |
| C | 2.842930  | -1.003026 | 0.817835  |
| H | 3.645983  | -1.493637 | 1.364680  |
| C | 2.968858  | 0.360363  | 0.462709  |
| H | 3.879653  | 0.892604  | 0.738941  |
| O | -0.490352 | -1.766509 | -0.566634 |
| C | -0.466678 | -2.437973 | -1.838900 |
| H | 0.271300  | -3.247507 | -1.835151 |
| H | -1.465661 | -2.854291 | -1.987003 |
| H | -0.235272 | -1.738410 | -2.651412 |
| C | 1.589816  | -3.215347 | 0.843090  |
| H | 2.138654  | -3.846055 | 0.131353  |
| H | 2.028797  | -3.388765 | 1.831648  |
| H | 0.550920  | -3.554536 | 0.859180  |

UB3LYP/6-31G(d)

E (0 K) = -715.215896  
E +ZPE (0 K) = -714.860638  
H (268 K) = -714.844708  
G (268 K) = -714.901176

M06-2X/6-31+G(d)

E (0 K) = -714.891781  
E +ZPE (0 K) = -714.536523  
H (268 K) = -714.520593  
G (268 K) = -714.577061

**Para, meta 3-methoxy-4-methyl cyclized radical cation (30\*)**

Number of imaginary frequencies: 0  
<S<sup>2</sup>> = 0.78

C -1.720949 2.398844 0.201609  
C -1.431999 0.878352 0.202546  
C -0.230188 0.570982 -0.905401  
C 0.930851 1.421086 -0.500596  
C 0.685998 2.902552 -0.462619  
C -0.466917 3.224623 0.512154  
H -1.026313 0.576857 1.172839  
H -2.122862 2.683709 -0.781299  
H -2.500956 2.616464 0.941271  
H 1.594943 3.439073 -0.167561  
H 0.405898 3.258892 -1.466678  
H -0.138525 3.019696 1.539986  
H -0.715068 4.291492 0.460072  
H -0.667585 0.941154 -1.847858  
C -2.632514 0.125956 -0.167329  
H -3.234622 0.524175 -0.989065  
C -2.417399 -1.746014 1.426259  
H -1.491948 -1.268172 1.736810  
H -3.120911 -1.778752 2.264895  
H -2.207172 -2.768109 1.098624  
C -4.257527 -1.664705 -0.212704  
H -3.997113 -2.657056 -0.593453  
H -4.985142 -1.770714 0.597987  
H -4.681062 -1.058501 -1.014293  
N -3.044903 -1.017153 0.314231  
C 0.094549 -0.879865 -1.003312  
C 1.272934 -1.421856 -0.575192  
C 2.286753 -0.549374 -0.054436  
C 2.098036 0.849650 -0.047134  
H 2.893041 1.505414 0.298860  
C 1.548922 -2.902523 -0.659880  
H 2.445532 -3.106667 -1.256667  
H 1.731352 -3.327826 0.334208  
H 0.703251 -3.429157 -1.111575  
H -0.656381 -1.536380 -1.442145  
O 3.412150 -1.171707 0.380964  
C 4.485896 -0.383921 0.894553  
H 4.167216 0.200058 1.766160  
H 5.257750 -1.095184 1.192751  
H 4.885121 0.290538 0.127700

UB3LYP/6-31G(d)

E (0 K) = -715.218154  
E +ZPE (0 K) = -714.862598  
H (268 K) = -714.846868  
G (268 K) = -714.902601

M06-2X/6-31+G(d)

E (0 K) = -714.892151  
E +ZPE (0 K) = -714.536595  
H (268 K) = -714.520865  
G (268 K) = -714.576598

**(E)-[N,N-dimethylamine] enammine radical cation  
of 5-(3,4-methylenedioxyphenyl)-pentanal (31\*)**

Number of imaginary frequencies: 0  
<S<sup>2</sup>> = 0.76

|   |           |           |           |
|---|-----------|-----------|-----------|
| C | -2.292761 | -0.599300 | 1.283621  |
| H | -2.187914 | -0.362565 | 2.354108  |
| H | -2.524943 | -1.667478 | 1.197236  |
| C | -0.935268 | -0.292847 | 0.592033  |
| H | -0.712918 | 0.778081  | 0.680984  |
| H | -1.013479 | -0.517885 | -0.478594 |
| C | 0.210827  | -1.117591 | 1.214282  |
| H | -0.028578 | -2.184671 | 1.123705  |
| H | 0.266373  | -0.891625 | 2.287545  |
| C | 1.544094  | -0.834427 | 0.556781  |
| C | 1.993189  | -1.622381 | -0.510944 |
| C | 2.325461  | 0.258260  | 0.999955  |
| C | 3.210591  | -1.368559 | -1.170429 |
| H | 1.383970  | -2.461846 | -0.843088 |
| C | 3.514522  | 0.499337  | 0.342770  |
| H | 2.005968  | 0.881824  | 1.833098  |
| C | 3.949847  | -0.293178 | -0.717925 |
| H | 3.556255  | -1.991684 | -1.992194 |
| O | 4.454419  | 1.468793  | 0.611003  |
| C | 5.416162  | 1.380681  | -0.452576 |
| H | 5.279193  | 2.226193  | -1.140604 |
| H | 6.425019  | 1.369706  | -0.031125 |
| C | -3.389766 | 0.227612  | 0.723183  |
| H | -3.319847 | 1.307439  | 0.857291  |
| C | -4.458977 | -0.330027 | 0.025538  |
| H | -4.505920 | -1.413083 | -0.102578 |
| N | -5.467507 | 0.357926  | -0.510522 |
| C | -5.558274 | 1.822047  | -0.425407 |
| H | -6.437316 | 2.150150  | -0.979854 |
| H | -5.653427 | 2.128013  | 0.621308  |
| H | -4.663591 | 2.276697  | -0.860666 |
| C | -6.556798 | -0.330361 | -1.205949 |
| H | -7.502691 | -0.104282 | -0.701371 |
| H | -6.609218 | 0.034485  | -2.237544 |
| H | -6.379737 | -1.406365 | -1.199591 |
| O | 5.177863  | 0.149685  | -1.154005 |

UB3LYP/6-31G(d)

E (0 K) = -749.924281  
E +ZPE (0 K) = -749.616170  
H (268 K) = -749.600802  
G (268 K) = -749.659210

M06-2X/6-31+G(d)

E (0 K) = -749.596801  
E +ZPE (0 K) = -749.288690  
H (268 K) = -749.273322  
G (268 K) = -749.331730

**TS7 (ortho, meta methylenedioxy)**

Number of imaginary frequencies: 1  
<S<sup>2</sup>> = 0.77

|   |           |           |           |
|---|-----------|-----------|-----------|
| C | -1.692399 | -2.345206 | -0.120075 |
| C | -0.484490 | -1.467865 | 0.217023  |
| C | -0.810443 | 0.139358  | -0.793338 |
| C | -2.107219 | 0.569988  | -0.248218 |
| C | -3.266336 | -0.355122 | -0.494055 |
| C | -3.039164 | -1.699782 | 0.231400  |
| H | -0.507712 | -1.077276 | 1.235261  |
| H | -1.662602 | -2.612359 | -1.185916 |
| H | -1.592779 | -3.285091 | 0.440072  |
| H | -4.199748 | 0.101152  | -0.146444 |
| H | -3.373262 | -0.544873 | -1.571970 |
| H | -3.090126 | -1.534224 | 1.315986  |
| H | -3.845873 | -2.396577 | -0.025009 |
| H | -0.834827 | -0.339879 | -1.775937 |
| C | 0.778713  | -1.965237 | -0.238394 |
| H | 0.797732  | -2.493846 | -1.194346 |
| C | 2.167700  | -1.127389 | 1.614799  |
| H | 1.274899  | -1.196006 | 2.236105  |
| H | 2.998663  | -1.615208 | 2.130495  |
| H | 2.421860  | -0.074620 | 1.450627  |
| C | 3.188004  | -2.193511 | -0.368075 |
| H | 3.786827  | -1.300583 | -0.579603 |
| H | 3.766900  | -2.869981 | 0.268047  |
| H | 2.937477  | -2.692013 | -1.305528 |
| N | 1.959829  | -1.798208 | 0.328724  |
| C | 0.238710  | 1.090485  | -0.580268 |
| C | 0.117293  | 2.181313  | 0.259868  |
| C | -1.082479 | 2.509031  | 0.868334  |
| H | -1.175902 | 3.375123  | 1.519044  |
| C | -2.193217 | 1.669915  | 0.581513  |
| H | -3.157744 | 1.925069  | 1.018459  |
| O | 1.515349  | 1.002400  | -1.059154 |
| C | 2.131068  | 2.261225  | -0.693545 |
| H | 3.143956  | 2.077323  | -0.330835 |
| H | 2.122121  | 2.920851  | -1.571558 |
| O | 1.334262  | 2.824755  | 0.352924  |

UB3LYP/6-31G(d)

E (0 K) = -749.9022692  
E +ZPE (0 K) = -749.592920  
H (268 K) = -749.579131  
G (268 K) = -749.630784

M06-2X/6-31+G(d)

E (0 K) = -749.579771  
E +ZPE (0 K) = -749.270422  
H (268 K) = -749.256633  
G (268 K) = -749.308286

**TS8 (*para, meta* methylenedioxy)**

Number of imaginary frequencies: 1  
 $\langle S^2 \rangle = 0.77$

|   |           |           |           |
|---|-----------|-----------|-----------|
| C | -2.190650 | 2.050886  | 0.309708  |
| C | -1.594421 | 0.640990  | 0.319760  |
| C | -0.173963 | 0.698098  | -0.965531 |
| C | 0.646020  | 1.780664  | -0.414281 |
| C | 0.021880  | 3.146392  | -0.365948 |
| C | -1.167557 | 3.149025  | 0.621092  |
| H | -1.027143 | 0.422054  | 1.225843  |
| H | -2.662303 | 2.237897  | -0.665621 |
| H | -2.993999 | 2.092701  | 1.057844  |
| H | 0.760092  | 3.896870  | -0.062466 |
| H | -0.343735 | 3.425062  | -1.364564 |
| H | -0.785843 | 3.014515  | 1.642149  |
| H | -1.665193 | 4.125460  | 0.590947  |
| H | -0.794462 | 1.001844  | -1.812899 |
| C | -2.481245 | -0.387260 | -0.128990 |
| H | -3.211169 | -0.120621 | -0.896674 |
| C | -1.622476 | -2.270750 | 1.229265  |
| H | -1.050671 | -1.510460 | 1.756952  |
| H | -2.269510 | -2.795527 | 1.940653  |
| H | -0.935332 | -2.993071 | 0.777541  |
| C | -3.370276 | -2.619442 | -0.469477 |
| H | -2.787822 | -3.423983 | -0.930908 |
| H | -4.045111 | -3.054092 | 0.275958  |
| H | -3.951859 | -2.105180 | -1.235876 |
| N | -2.460564 | -1.672871 | 0.185639  |
| C | 0.433239  | -0.624196 | -1.106928 |
| C | 1.632992  | -0.830051 | -0.500866 |
| C | 2.338033  | 0.205892  | 0.153058  |
| C | 1.867721  | 1.513112  | 0.196879  |
| H | 2.452646  | 2.302290  | 0.666150  |
| H | -0.069491 | -1.412219 | -1.661046 |
| O | 3.504298  | -0.274511 | 0.650901  |
| C | 3.577482  | -1.664033 | 0.271944  |
| H | 3.646442  | -2.277735 | 1.175680  |
| H | 4.442331  | -1.810044 | -0.383736 |
| O | 2.372627  | -1.980693 | -0.437591 |

UB3LYP/6-31G(d)

E (0 K) = -749.906067  
 E +ZPE (0 K) = -749.596707  
 H (268 K) = -749.582723  
 G (268 K) = -749.635659

M06-2X/6-31+G(d)

E (0 K) = -749.582349  
 E +ZPE (0 K) = -749.272989  
 H (268 K) = -749.259005  
 G (268 K) = -749.311941

***Ortho, meta* methylenedioxy cyclized radical cation (32\*)**

Number of imaginary frequencies: 0  
 $\langle S^2 \rangle = 0.78$

|   |           |           |           |
|---|-----------|-----------|-----------|
| C | -0.059595 | -2.759619 | -0.141815 |
| C | 0.335104  | -1.278353 | 0.111449  |
| C | -0.705767 | -0.319967 | -0.655911 |
| C | -2.114384 | -0.663915 | -0.199929 |
| C | -2.504914 | -2.102895 | -0.396388 |
| C | -1.500565 | -3.042962 | 0.301044  |
| H | 0.253602  | -1.056349 | 1.180204  |
| H | 0.053247  | -2.981125 | -1.212467 |
| H | 0.637466  | -3.411719 | 0.397678  |
| H | -3.517290 | -2.278521 | -0.015582 |
| H | -2.516504 | -2.343051 | -1.472062 |
| H | -1.581389 | -2.919781 | 1.389196  |
| H | -1.743621 | -4.088091 | 0.074898  |
| H | -0.588198 | -0.574506 | -1.727475 |
| C | 1.693028  | -1.045917 | -0.423089 |
| H | 1.837234  | -1.261504 | -1.486898 |
| C | 2.785947  | -0.228713 | 1.620679  |
| H | 1.908807  | -0.589536 | 2.153052  |
| H | 3.687484  | -0.653871 | 2.068810  |
| H | 2.834600  | 0.863460  | 1.677748  |
| C | 4.014813  | -0.403804 | -0.514412 |
| H | 4.288107  | 0.652771  | -0.433514 |
| H | 4.792503  | -1.016140 | -0.049351 |
| H | 3.897213  | -0.679053 | -1.562966 |
| N | 2.745296  | -0.619098 | 0.202872  |
| C | -0.441265 | 1.114634  | -0.425061 |
| C | -1.295588 | 1.989678  | 0.192004  |
| C | -2.562579 | 1.620017  | 0.633650  |
| H | -3.233577 | 2.321585  | 1.120497  |
| C | -2.927557 | 0.255877  | 0.408145  |
| H | -3.918275 | -0.064629 | 0.730218  |
| O | 0.752915  | 1.729186  | -0.718541 |
| O | -0.682493 | 3.224746  | 0.315883  |
| C | 0.515367  | 3.131356  | -0.461778 |
| H | 1.356304  | 3.543981  | 0.100675  |
| H | 0.379560  | 3.645814  | -1.423039 |

UB3LYP/6-31G(d)

E (0 K) = -749.907386  
 E +ZPE (0 K) = -749.596830  
 H (268 K) = -749.582804  
 G (268 K) = -749.635601

M06-2X/6-31+G(d)

E (0 K) = -749.588893  
 E +ZPE (0 K) = -749.275377  
 H (268 K) = -749.264311  
 G (268 K) = -749.317108

**Para, meta methylenedioxy cyclized radical cation  
(33\*)**

Number of imaginary frequencies: 0  
<S<sup>2</sup>> = 0.78

|   |           |           |           |
|---|-----------|-----------|-----------|
| C | -2.096675 | 2.087876  | 0.182199  |
| C | -1.475704 | 0.668753  | 0.177873  |
| C | -0.175973 | 0.646594  | -0.821807 |
| C | 0.756084  | 1.727551  | -0.320348 |
| C | 0.181518  | 3.115460  | -0.286011 |
| C | -1.079309 | 3.154173  | 0.602910  |
| H | -1.099969 | 0.428888  | 1.177322  |
| H | -2.478452 | 2.312137  | -0.824177 |
| H | -2.957157 | 2.102837  | 0.862115  |
| H | 0.926510  | 3.831333  | 0.079271  |
| H | -0.099381 | 3.426791  | -1.304855 |
| H | -0.789261 | 2.993484  | 1.649916  |
| H | -1.548416 | 4.143756  | 0.546196  |
| H | -0.593364 | 0.954629  | -1.795907 |
| C | -2.468762 | -0.307734 | -0.295857 |
| H | -3.069928 | -0.019998 | -1.164202 |
| C | -2.012948 | -2.124064 | 1.306519  |
| H | -1.219988 | -1.484053 | 1.683678  |
| H | -2.754446 | -2.307207 | 2.090819  |
| H | -1.588654 | -3.079028 | 0.984259  |
| C | -3.718296 | -2.369416 | -0.459233 |
| H | -3.242181 | -3.284785 | -0.823147 |
| H | -4.462359 | -2.627316 | 0.300381  |
| H | -4.196775 | -1.842692 | -1.285707 |
| N | -2.692233 | -1.507636 | 0.155500  |
| C | 0.433672  | -0.724459 | -0.932665 |
| C | 1.670297  | -0.922724 | -0.422598 |
| C | 2.448303  | 0.113596  | 0.151663  |
| C | 2.006058  | 1.435540  | 0.193300  |
| H | 2.642407  | 2.221330  | 0.598157  |
| H | -0.113701 | -1.527772 | -1.420566 |
| O | 3.643746  | -0.386753 | 0.579950  |
| C | 3.676723  | -1.765772 | 0.172289  |
| H | 3.870229  | -2.394513 | 1.046744  |
| H | 4.450218  | -1.895494 | -0.593955 |
| O | 2.393800  | -2.089637 | -0.377980 |

UB3LYP/6-31G(d)

E (0 K) = -749.908830  
E + ZPE (0 K) = -749.598398  
H (268 K) = -749.584251  
G (268 K) = -749.637589

M06-2X/6-31+G(d)

E (0 K) = -749.589886  
E + ZPE (0 K) = -749.279454  
H (268 K) = -749.265307  
G (268 K) = -749.318645



**(E)-[N,N-dimethylamine] enamine radical cation  
of 5-phenylpentanal (34\*)**

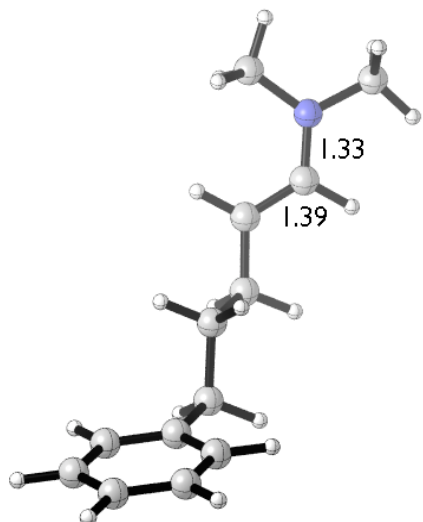

Number of imaginary frequencies: 0  
<S<sup>2</sup>> = 0.76

|   |           |           |           |
|---|-----------|-----------|-----------|
| C | -1.122938 | -0.655261 | -1.173408 |
| H | -1.007338 | -1.643938 | -1.645602 |
| H | -1.245578 | 0.084974  | -1.973048 |
| C | 0.169015  | -0.358547 | -0.364170 |
| H | 0.279297  | -1.102738 | 0.434837  |
| H | 0.076934  | 0.621555  | 0.119834  |
| C | 1.418506  | -0.377361 | -1.268094 |
| H | 1.290152  | 0.363185  | -2.068248 |
| H | 1.492555  | -1.361235 | -1.749882 |
| C | 2.686272  | -0.085438 | -0.494068 |
| C | 3.146190  | 1.230847  | -0.338629 |
| C | 3.409718  | -1.122821 | 0.113538  |
| C | 4.297403  | 1.504762  | 0.403703  |
| H | 2.598687  | 2.048206  | -0.808753 |
| C | 4.561460  | -0.853563 | 0.856481  |
| H | 3.069300  | -2.152194 | -0.002032 |
| C | 5.008796  | 0.462446  | 1.004709  |
| H | 4.641201  | 2.533007  | 0.509134  |
| H | 5.908198  | 0.673842  | 1.581334  |
| C | -2.320813 | -0.692911 | -0.298212 |
| H | -2.347696 | -1.458976 | 0.477405  |
| C | -3.366634 | 0.219516  | -0.426451 |
| H | -3.318289 | 0.981742  | -1.206481 |
| N | -4.458279 | 0.243900  | 0.338073  |
| C | -4.679033 | -0.712843 | 1.431702  |
| H | -5.616048 | -0.463910 | 1.929435  |
| H | -4.739767 | -1.728793 | 1.029138  |
| H | -3.857452 | -0.651142 | 2.151355  |
| C | -5.509124 | 1.238221  | 0.111283  |
| H | -6.449959 | 0.720347  | -0.105211 |
| H | -5.634931 | 1.837888  | 1.019385  |
| H | -5.236616 | 1.881592  | -0.725958 |
| H | 5.112393  | -1.672992 | 1.316547  |

UB3LYP/6-31G(d)

E (0 K) = -561.394091  
E +ZPE (0 K) = -561.101444  
H (268 K) = -561.088003  
G (268 K) = -561.141329

M06-2X/6-31+G(d)

E (0 K) = -561.120899  
E +ZPE (0 K) = -560.828252  
H (268 K) = -560.814811  
G (268 K) = -560.868137

**Arylation TS, unsubstituted benzene (TS9\*)**

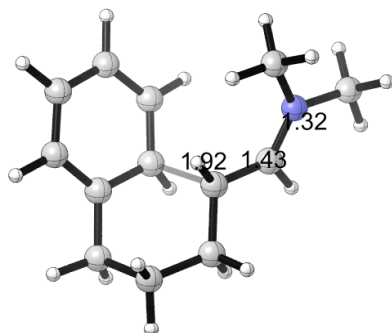

UB3LYP/6-31G(d)

E (0 K) = -561.370614

E +ZPE (0 K) = -561.077051

H (268 K) = -561.065144

G (268 K) = -561.112157

M06-2X/6-31+G(d)

E (0 K) = -561.101091

E +ZPE (0 K) = -560.807527

H (268 K) = -560.795621

G (268 K) = -560.842634

Number of imaginary frequencies: 1  
 $\langle S^2 \rangle = 0.78$

|   |           |           |           |
|---|-----------|-----------|-----------|
| C | -0.384751 | -2.297442 | 0.178146  |
| C | 0.321476  | -0.943239 | 0.274177  |
| C | -0.675748 | 0.206086  | -0.903730 |
| C | -2.008897 | 0.091769  | -0.318630 |
| C | -2.662334 | -1.259456 | -0.353820 |
| C | -1.873195 | -2.243122 | 0.540227  |
| H | 0.161716  | -0.442014 | 1.229363  |
| H | -0.255878 | -2.702623 | -0.835431 |
| H | 0.120966  | -2.994853 | 0.860471  |
| H | -3.701116 | -1.195461 | -0.011093 |
| H | -2.674243 | -1.645025 | -1.383443 |
| H | -1.984162 | -1.940838 | 1.590354  |
| H | -2.301901 | -3.248042 | 0.449120  |
| H | -0.512249 | -0.395139 | -1.803167 |
| C | 1.666318  | -0.938619 | -0.221183 |
| H | 1.898767  | -1.618403 | -1.044566 |
| C | 2.615049  | 0.820787  | 1.235158  |
| H | 1.624265  | 0.866513  | 1.680307  |
| H | 3.346315  | 0.521354  | 1.994225  |
| H | 2.884650  | 1.810585  | 0.854806  |
| C | 3.959551  | -0.224901 | -0.545095 |
| H | 4.203276  | 0.749167  | -0.981798 |
| H | 4.730901  | -0.489906 | 0.185715  |
| H | 3.922473  | -0.980691 | -1.330736 |
| N | 2.658302  | -0.143316 | 0.130618  |
| C | -0.074269 | 1.528462  | -0.922883 |
| H | 0.842103  | 1.680499  | -1.490489 |
| C | -0.638754 | 2.572334  | -0.223609 |
| H | -0.157243 | 3.549180  | -0.217864 |
| C | -1.863954 | 2.393113  | 0.453662  |
| H | -2.305600 | 3.221288  | 1.005204  |
| C | -2.538003 | 1.161821  | 0.384499  |
| H | -3.506084 | 1.052062  | 0.873179  |

**Cyclized radical cation, unsubstituted benzene  
(35\*)**

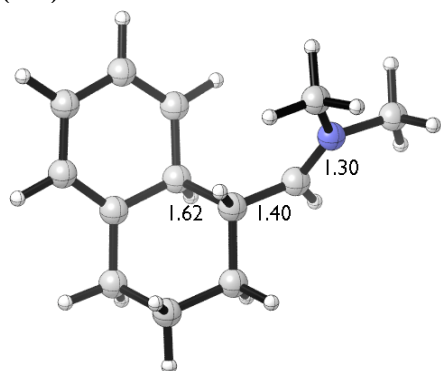

Number of imaginary frequencies: 0  
 $\langle S^2 \rangle = 0.79$

|   |           |           |           |
|---|-----------|-----------|-----------|
| C | -0.088554 | -2.244549 | 0.062580  |
| C | 0.356141  | -0.760006 | 0.136733  |
| C | -0.648606 | 0.154649  | -0.746009 |
| C | -2.042790 | -0.095952 | -0.228011 |
| C | -2.505896 | -1.525197 | -0.255097 |
| C | -1.534524 | -2.423227 | 0.539013  |
| H | 0.276872  | -0.409553 | 1.170447  |
| H | 0.009511  | -2.594774 | -0.974744 |
| H | 0.587167  | -2.855000 | 0.673911  |
| H | -3.520847 | -1.608609 | 0.149895  |
| H | -2.539323 | -1.884732 | -1.296352 |
| H | -1.602324 | -2.176887 | 1.607127  |
| H | -1.821795 | -3.476055 | 0.432109  |
| H | -0.557572 | -0.257328 | -1.769137 |
| C | 1.725548  | -0.634230 | -0.398138 |
| H | 1.924639  | -1.130841 | -1.353518 |
| C | 2.707150  | 0.780810  | 1.362548  |
| H | 1.738021  | 0.710380  | 1.849380  |
| H | 3.485300  | 0.380716  | 2.019122  |
| H | 2.931525  | 1.827134  | 1.135805  |
| C | 4.033938  | 0.048450  | -0.584982 |
| H | 4.294886  | 1.087956  | -0.803845 |
| H | 4.788774  | -0.382388 | 0.079219  |
| H | 3.977310  | -0.526167 | -1.510102 |
| N | 2.728139  | 0.019896  | 0.101826  |
| C | -0.251603 | 1.600799  | -0.738988 |
| H | 0.700394  | 1.870694  | -1.195745 |
| C | -1.046496 | 2.572617  | -0.195706 |
| H | -0.709564 | 3.608867  | -0.202692 |
| C | -2.313392 | 2.258299  | 0.357770  |
| H | -2.930743 | 3.040492  | 0.793662  |
| C | -2.783540 | 0.923881  | 0.316249  |
| H | -3.773462 | 0.698762  | 0.714897  |

UB3LYP/6-31G(d)

E (0 K) = -561.3749443  
 E +ZPE (0 K) = -561.080285  
 H (268 K) = -561.068256  
 G (268 K) = -561.115842

M06-2X/6-31+G(d)

E (0 K) = -561.1101459  
 E +ZPE (0 K) = -560.815487  
 H (268 K) = -560.803458  
 G (268 K) = -560.851044

**(E)-[N,N-dimethylamine] enamine of propanal (S1)**

Number of imaginary frequencies: 0

|   |           |           |           |
|---|-----------|-----------|-----------|
| C | -1.389578 | 0.329902  | 0.078438  |
| H | -1.266368 | 1.388497  | 0.296285  |
| C | -0.316598 | -0.439351 | -0.174321 |
| H | -0.458323 | -1.503121 | -0.366597 |
| N | 1.018070  | -0.047312 | -0.282386 |
| C | 1.335594  | 1.336043  | 0.010917  |
| H | 1.164511  | 1.604158  | 1.069202  |
| H | 2.387316  | 1.523131  | 0.227068  |
| H | 0.719951  | 1.994944  | -0.610011 |
| C | 2.009746  | -1.011726 | 0.168444  |
| H | 1.740591  | -2.009516 | -0.193103 |
| H | 2.990665  | -0.753174 | -0.245509 |
| H | 2.102192  | -1.060912 | 1.268047  |
| C | -2.799458 | -0.191862 | 0.055631  |
| H | -3.314947 | -0.013653 | 1.010031  |
| H | -3.406700 | 0.293711  | -0.722192 |
| H | -2.823618 | -1.270926 | -0.137034 |

E (0 K) = -251.879305  
E + ZPE (0 K) = -251.724756  
H (298 K) = -251.716021  
G (298 K) = -251.755953

**N,N-dimethyliminium of propanal (S2)**

Number of imaginary frequencies: 0

|   |           |           |           |
|---|-----------|-----------|-----------|
| C | -0.260342 | -0.431482 | -0.004375 |
| H | -0.428018 | -1.508258 | -0.007252 |
| N | 0.979049  | -0.067820 | -0.000455 |
| C | 1.420157  | 1.340969  | 0.002764  |
| H | 2.022668  | 1.513849  | 0.898652  |
| H | 2.038320  | 1.512550  | -0.882589 |
| H | 0.567148  | 2.015048  | -0.005579 |
| C | 2.077854  | -1.058177 | 0.001086  |
| H | 1.668142  | -2.068213 | 0.000574  |
| H | 2.691966  | -0.903753 | -0.889795 |
| H | 2.689291  | -0.903702 | 0.893800  |
| C | -1.453980 | 0.468282  | -0.005892 |
| H | -1.392448 | 1.137116  | 0.864930  |
| H | -1.399047 | 1.121721  | -0.889101 |
| C | -2.776729 | -0.310694 | 0.005512  |
| H | -2.865709 | -0.934527 | 0.900392  |
| H | -3.615404 | 0.389346  | 0.002451  |
| H | -2.872011 | -0.949831 | -0.877871 |

E (0 K) = -252.2703126  
E + ZPE (0 K) = -252.102482  
H (298 K) = -252.093187  
G (298 K) = -252.136415

**(E)-[N,N-dimethylamine] enamine radical cation of propanal, unconjugated (S3)**

*The C2-C2-N-C3 dihedral was constrained at 90°*

Number of imaginary frequencies: 1  
<S<sup>2</sup>> = 0.76

|   |           |           |           |
|---|-----------|-----------|-----------|
| C | -1.326480 | 0.232380  | 0.291237  |
| H | -1.052937 | 0.735656  | 1.219254  |
| C | -0.351791 | -0.082657 | -0.599404 |
| H | -0.580690 | -0.758451 | -1.424689 |
| N | 1.012759  | -0.035181 | -0.282988 |
| C | 1.635409  | 1.245056  | 0.046336  |
| H | 0.927886  | 2.057932  | -0.115113 |
| H | 2.008178  | 1.238836  | 1.077231  |
| H | 2.496882  | 1.383016  | -0.622193 |
| C | 1.662649  | -1.230536 | 0.259471  |
| H | 1.254448  | -2.128419 | -0.209348 |
| H | 2.742458  | -1.175469 | 0.103017  |
| H | 1.447608  | -1.258152 | 1.336462  |
| C | -2.766899 | -0.070934 | 0.080309  |
| H | -3.139186 | -0.714677 | 0.888137  |
| H | -3.349213 | 0.859244  | 0.140754  |
| H | -2.962078 | -0.553105 | -0.880287 |

E (0 K) = -251.5986156  
E + ZPE (0 K) = -251.445898  
H (298 K) = -251.437342  
G (298 K) = -251.478105

**(E)-[N,N-dimethylamine] enamine of 5-(3-methoxyphenyl)-pentanal (S4)**

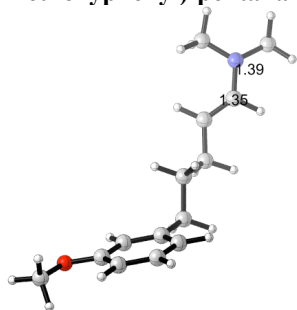

Number of imaginary frequencies: 0

|   |           |           |           |
|---|-----------|-----------|-----------|
| C | -1.990011 | -0.423034 | 1.238260  |
| H | -1.842002 | -0.068549 | 2.271142  |
| H | -2.247064 | -1.489139 | 1.315976  |
| C | -0.654663 | -0.278820 | 0.482328  |
| H | -0.404589 | 0.786032  | 0.378459  |
| H | -0.771592 | -0.665504 | -0.538347 |
| C | 0.513823  | -1.004329 | 1.179745  |
| H | 0.265906  | -2.070027 | 1.276476  |
| H | 0.616523  | -0.614233 | 2.201197  |
| C | 1.827847  | -0.855139 | 0.442780  |
| C | 2.200939  | -1.769693 | -0.556266 |
| C | 2.674238  | 0.219025  | 0.717125  |
| C | 3.392325  | -1.597710 | -1.254001 |
| H | 1.555766  | -2.616066 | -0.779163 |
| C | 3.874173  | 0.393555  | 0.013720  |
| H | 2.422417  | 0.944086  | 1.486609  |
| C | 4.240439  | -0.519711 | -0.980776 |
| H | 3.677037  | -2.311719 | -2.022865 |
| H | 5.165339  | -0.407710 | -1.534854 |
| O | 4.615307  | 1.484271  | 0.377870  |
| C | 5.838831  | 1.717417  | -0.298011 |
| H | 5.684384  | 1.873275  | -1.374313 |
| H | 6.255807  | 2.626254  | 0.140433  |
| H | 6.546247  | 0.889456  | -0.154314 |
| C | -3.125760 | 0.327936  | 0.596265  |
| H | -3.027332 | 1.411135  | 0.557232  |
| C | -4.197983 | -0.277578 | 0.055218  |
| H | -4.287757 | -1.361868 | 0.125475  |
| N | -5.244523 | 0.302750  | -0.659361 |
| C | -5.262982 | 1.748059  | -0.767946 |
| H | -6.065071 | 2.048602  | -1.449093 |
| H | -5.421831 | 2.251836  | 0.202365  |
| H | -4.311432 | 2.098436  | -1.180719 |
| C | -6.551398 | -0.319556 | -0.513624 |
| H | -7.055667 | -0.058146 | 0.433629  |
| H | -7.200515 | -0.013600 | -1.341545 |
| H | -6.444283 | -1.408511 | -0.550107 |

E (0 K) = -676.079697

E +ZPE (0 K) = -675.753426

H (298 K) = -675.735069

G (298 K) = -675.801623

**(E)-[N,N-dimethylamine] enamine of 5-(3-methoxyphenyl)-pentanal, dication (S5)**

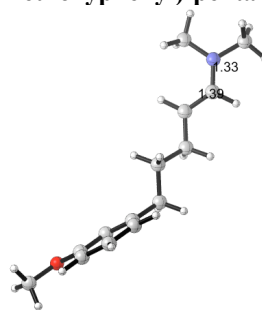

Number of imaginary frequencies: 0

|   |           |           |           |
|---|-----------|-----------|-----------|
| C | 2.003137  | 0.016077  | 1.071081  |
| H | 1.878050  | -0.717129 | 1.887105  |
| H | 2.213242  | 0.978227  | 1.553051  |
| C | 0.673233  | 0.081681  | 0.278762  |
| H | 0.475367  | -0.888793 | -0.192962 |
| H | 0.764907  | 0.816337  | -0.530656 |
| C | -0.503898 | 0.455281  | 1.210013  |
| H | -0.296045 | 1.422773  | 1.685086  |
| H | -0.574416 | -0.280538 | 2.018721  |
| C | -1.840733 | 0.539773  | 0.503256  |
| C | -2.165146 | 1.671720  | -0.301575 |
| C | -2.793723 | -0.446943 | 0.629555  |
| C | -3.414521 | 1.798012  | -0.960725 |
| H | -1.440645 | 2.475408  | -0.404338 |
| C | -4.066453 | -0.324843 | -0.029212 |
| H | -2.634941 | -1.332124 | 1.237811  |
| C | -4.371639 | 0.819310  | -0.837800 |
| H | -3.613615 | 2.681420  | -1.558904 |
| H | -5.331828 | 0.910072  | -1.331849 |
| O | -4.885277 | -1.320573 | 0.182205  |
| C | -6.233276 | -1.378570 | -0.375962 |
| H | -6.175041 | -1.384200 | -1.466746 |
| H | -6.641309 | -2.316561 | -0.006341 |
| H | -6.814919 | -0.530844 | -0.007005 |
| C | 3.171665  | -0.431413 | 0.259035  |
| H | 3.045408  | -1.317089 | -0.359770 |
| C | 4.412277  | 0.204007  | 0.310255  |
| H | 4.530643  | 1.088108  | 0.931001  |
| N | 5.511960  | -0.185600 | -0.338101 |
| C | 5.544900  | -1.369859 | -1.214821 |
| H | 6.510274  | -1.405360 | -1.718088 |
| H | 5.418946  | -2.277560 | -0.616093 |
| H | 4.752643  | -1.304629 | -1.964594 |
| C | 6.775870  | 0.546965  | -0.177276 |
| H | 7.535983  | -0.138380 | 0.212694  |
| H | 7.101399  | 0.914615  | -1.156065 |
| H | 6.644247  | 1.382838  | 0.509495  |

E (0 K) = -675.488273

E +ZPE (0 K) = -675.162586

H (298 K) = -675.143572

G (298 K) = -675.211228

### Dication of 17\* (S6)

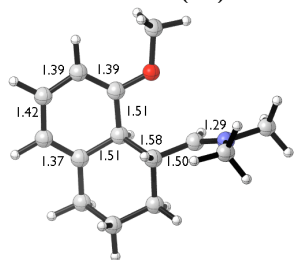

Number of imaginary frequencies: 0

|   |           |           |           |
|---|-----------|-----------|-----------|
| C | 0.343313  | -2.332292 | -0.258153 |
| C | 0.401357  | -0.809903 | 0.100174  |
| C | -0.850314 | -0.041877 | -0.477013 |
| C | -2.140848 | -0.775416 | -0.180827 |
| C | -2.177291 | -2.243657 | -0.470259 |
| C | -0.979816 | -2.968709 | 0.175746  |
| H | 0.379799  | -0.706737 | 1.188751  |
| H | 0.482007  | -2.459141 | -1.339971 |
| H | 1.183027  | -2.835317 | 0.233015  |
| H | -3.125127 | -2.669827 | -0.130981 |
| H | -2.136997 | -2.390799 | -1.560956 |
| H | -1.072635 | -2.947038 | 1.268088  |
| H | -0.987979 | -4.020925 | -0.123614 |
| H | -0.765250 | -0.064841 | -1.580514 |
| C | 1.688448  | -0.294572 | -0.471590 |
| H | 1.688728  | -0.024058 | -1.525681 |
| C | 3.110891  | -0.605494 | 1.517174  |
| H | 2.194919  | -0.844844 | 2.051247  |
| H | 3.784140  | -1.467086 | 1.535471  |
| H | 3.608611  | 0.242447  | 1.994286  |
| C | 4.058185  | 0.141157  | -0.651759 |
| H | 4.512568  | 1.004371  | -0.159092 |
| H | 4.763984  | -0.693537 | -0.638612 |
| H | 3.795524  | 0.389530  | -1.680001 |
| N | 2.843113  | -0.254123 | 0.104960  |
| C | -0.855960 | 1.429360  | -0.129197 |
| C | -1.999484 | 2.064128  | 0.338212  |
| H | -2.010248 | 3.125910  | 0.551953  |
| C | -3.149126 | 1.303259  | 0.545742  |
| C | -3.221643 | -0.091717 | 0.300720  |
| H | -4.155110 | -0.611090 | 0.493000  |
| H | -4.037289 | 1.808189  | 0.919057  |
| O | 0.298642  | 2.016952  | -0.348282 |
| C | 0.452786  | 3.463152  | -0.174832 |
| H | 0.281684  | 3.727586  | 0.870805  |
| H | 1.481501  | 3.671742  | -0.460679 |
| H | -0.239773 | 3.984195  | -0.838867 |

E (0 K) = -675.510304

E +ZPE (0 K) = -675.179126

H (298 K) = -675.161953

G (298 K) = -675.223103

### Dication of 18\* (S7)

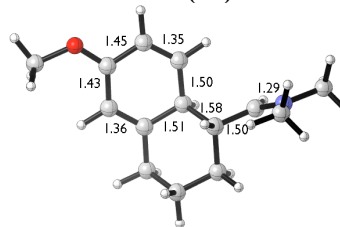

Number of imaginary frequencies: 0

|   |           |           |           |
|---|-----------|-----------|-----------|
| C | -1.552769 | 1.961149  | -0.024983 |
| C | -1.234444 | 0.432971  | 0.068449  |
| C | 0.076355  | 0.078614  | -0.740222 |
| C | 1.204081  | 1.010496  | -0.367015 |
| C | 0.907323  | 2.479526  | -0.395688 |
| C | -0.357145 | 2.805224  | 0.428163  |
| H | -1.062158 | 0.172105  | 1.116294  |
| H | -1.823726 | 2.216537  | -1.057820 |
| H | -2.425679 | 2.179473  | 0.599407  |
| H | 1.765590  | 3.052499  | -0.034443 |
| H | 0.739892  | 2.782041  | -1.440689 |
| H | -0.160622 | 2.640180  | 1.494256  |
| H | -0.599704 | 3.865518  | 0.310496  |
| H | -0.147592 | 0.296470  | -1.802148 |
| C | -2.415666 | -0.301121 | -0.488721 |
| H | -2.484824 | -0.368490 | -1.574883 |
| C | -3.581329 | -0.804532 | 1.623016  |
| H | -2.725020 | -0.356441 | 2.120067  |
| H | -4.486905 | -0.243478 | 1.869738  |
| H | -3.705585 | -1.840108 | 1.950250  |
| C | -4.563829 | -1.407474 | -0.576094 |
| H | -4.677876 | -2.441510 | -0.241063 |
| H | -5.469956 | -0.846498 | -0.332931 |
| H | -4.383408 | -1.377796 | -1.650550 |
| N | -3.420827 | -0.797716 | 0.151725  |
| C | 0.419670  | -1.377265 | -0.664317 |
| C | 1.644762  | -1.826321 | -0.330490 |
| H | 1.895126  | -2.881784 | -0.298081 |
| C | 2.690543  | -0.879484 | -0.016574 |
| C | 2.435342  | 0.527713  | -0.031085 |
| H | 3.233995  | 1.217840  | 0.217617  |
| H | -0.355556 | -2.096204 | -0.921517 |
| O | 3.833171  | -1.414674 | 0.266015  |
| C | 5.029583  | -0.637093 | 0.594359  |
| H | 5.802398  | -1.385928 | 0.752355  |
| H | 5.284717  | 0.009318  | -0.247694 |
| H | 4.852458  | -0.066760 | 1.508364  |

E (0 K) = -675.516269

E +ZPE (0 K) = -675.185246

H (298 K) = -675.168021

G (298 K) = -675.229474

***N,N*-dimethyl iminium of 6-methoxy-1,2,3,4-tetrahydronaphthalene-1-carbaldehyde (S8, *ortho*)**

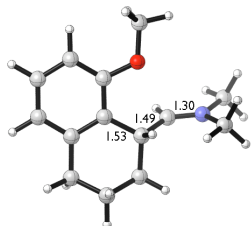

Number of imaginary frequencies: 0

|   |           |           |           |
|---|-----------|-----------|-----------|
| C | -0.273267 | -2.361436 | 0.094510  |
| C | -0.408999 | -0.859267 | -0.306047 |
| C | 0.879039  | -0.073254 | -0.070971 |
| C | 2.116018  | -0.701645 | 0.130243  |
| C | 2.234295  | -2.212419 | 0.191581  |
| C | 1.042330  | -2.928966 | -0.446784 |
| H | -0.664562 | -0.809261 | -1.371199 |
| H | -0.288093 | -2.460076 | 1.188455  |
| H | -1.136410 | -2.915603 | -0.290858 |
| H | 3.166207  | -2.523960 | -0.292957 |
| H | 2.323734  | -2.523607 | 1.242861  |
| H | 1.070275  | -2.814326 | -1.538167 |
| H | 1.087878  | -4.002612 | -0.236396 |
| C | -1.520079 | -0.290929 | 0.509734  |
| H | -1.260128 | 0.049138  | 1.509992  |
| C | 0.815210  | 1.334023  | -0.131834 |
| C | 1.956672  | 2.115727  | 0.023852  |
| H | 1.909634  | 3.197102  | -0.020410 |
| C | 3.182488  | 1.477316  | 0.233972  |
| H | 4.079516  | 2.077630  | 0.352468  |
| C | 3.262964  | 0.091372  | 0.283371  |
| H | 4.223918  | -0.391232 | 0.437395  |
| O | -0.447209 | 1.838194  | -0.348687 |
| C | -0.613292 | 3.256586  | -0.418808 |
| H | -0.033840 | 3.675805  | -1.248207 |
| H | -1.675962 | 3.426761  | -0.598347 |
| H | -0.316442 | 3.737041  | 0.520322  |
| N | -2.784338 | -0.260839 | 0.227264  |
| C | -3.369197 | -0.679828 | -1.058883 |
| H | -4.131793 | -1.438495 | -0.864502 |
| H | -3.839605 | 0.187891  | -1.529715 |
| H | -2.609604 | -1.087805 | -1.720060 |
| C | -3.768990 | 0.261071  | 1.195199  |
| H | -3.264559 | 0.564134  | 2.112692  |
| H | -4.280949 | 1.120707  | 0.754180  |
| H | -4.502337 | -0.519024 | 1.416283  |

E (0 K) = -675.284430

E +ZPE (0 K) = -674.964710

H (298 K) = -674.947896

G (298 K) = -675.007954

***N,N*-dimethyl iminium of 6-methoxy-1,2,3,4-tetrahydronaphthalene-1-carbaldehyde (S9, *para*)**

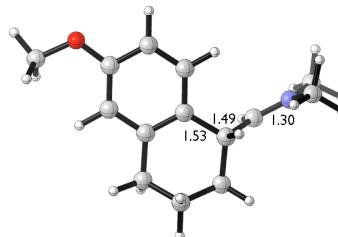

Number of imaginary frequencies: 0

|   |           |           |           |
|---|-----------|-----------|-----------|
| C | 1.561449  | 2.179438  | 0.128493  |
| C | 1.413033  | 0.709971  | -0.369948 |
| C | -0.017453 | 0.167368  | -0.251608 |
| C | -1.102583 | 0.996503  | 0.079659  |
| C | -0.919879 | 2.482692  | 0.323132  |
| C | 0.362522  | 3.020428  | -0.316511 |
| H | 1.739876  | 0.666317  | -1.413760 |
| H | 1.619354  | 2.200882  | 1.225587  |
| H | 2.504921  | 2.587555  | -0.248806 |
| H | -1.791642 | 3.024145  | -0.060390 |
| H | -0.894629 | 2.678834  | 1.405399  |
| H | 0.277433  | 3.002775  | -1.410565 |
| H | 0.524653  | 4.063225  | -0.024517 |
| C | 2.247235  | -0.152905 | 0.506128  |
| H | 1.960293  | -0.167700 | 1.555996  |
| C | -0.253391 | -1.197144 | -0.513029 |
| C | -1.521175 | -1.742644 | -0.431873 |
| H | -1.705002 | -2.791539 | -0.638201 |
| C | -2.607708 | -0.918272 | -0.086802 |
| C | -2.387480 | 0.444140  | 0.153036  |
| H | -3.218339 | 1.099449  | 0.390753  |
| N | 3.260360  | -0.906714 | 0.202705  |
| C | 3.836983  | -1.050522 | -1.146963 |
| H | 3.853375  | -2.112117 | -1.407548 |
| H | 3.254318  | -0.502349 | -1.882398 |
| H | 4.862528  | -0.671144 | -1.131873 |
| C | 3.946139  | -1.710462 | 1.235781  |
| H | 3.483886  | -1.540204 | 2.208048  |
| H | 3.872219  | -2.768752 | 0.971237  |
| H | 4.999817  | -1.421040 | 1.270696  |
| H | 0.572155  | -1.844225 | -0.804601 |
| O | -3.809140 | -1.528602 | -0.028242 |
| C | -4.965910 | -0.758705 | 0.300108  |
| H | -5.798629 | -1.461981 | 0.288878  |
| H | -4.875250 | -0.313955 | 1.298164  |
| H | -5.141431 | 0.028314  | -0.442715 |

E (0 K) = -675.279684

E +ZPE (0 K) = -674.960237

H (298 K) = -674.943370

G (298 K) = -675.004258

## **References: (Manuscript endnote 5):**

### B3LYP

- (a) Becke, A. D. *J. Chem. Phys.* **1993**, *98*, 5648-5652. (b) Becke, A. D. *J. Chem. Phys.* **1993**, *98*, 1372-1377. (c) Lee, C.; Yang, W.; Parr, R. G. *Phys. Rev. B* **1988**, *37*, 785-789.

### 6-31G(d), 6-31+G(d)

- (a) Ditchfield, R.; Hehre, W. J.; Pople, J. A. *J. Chem. Phys.* **1971**, *54*, 724-728. (b) Hehre, W. J.; Ditchfield, R.; Pople, J. A. *J. Chem. Phys.* **1972**, *56*, 2257-2261. (c) Hariharan, P. C.; Pople, J. A. *Theor. Chim. Acta* **1973**, *28*, 213-222.

### CBS-QB3

- (a) Montgomery, J. A. Jr.; Frisch, M. J.; Ochterski, J. W.; Petersson, G. A. *J. Chem. Phys.* **1999**, *110*, 2822-27. (b) Montgomery, J. A. Jr.; Frisch, M. J.; Ochterski, J. W.; Petersson, G. A. *J. Chem. Phys.* **2000**, *112*, 6532-6542.

### M06-2X

- (a) Zhao, Y.; Truhlar, D. G. *Theor. Chem. Acc.* **2008**, *120*, 215-241. (b) Zhao, Y.; Truhlar, D. G. *Acc. Chem. Res.* **2008**, *41*, 157-167.

### CPCM

- (a) Barone, V.; Cossi, M. *J. Phys. Chem. A* **1998**, *102*, 1995. (b) Cossi, M.; Rega, N.; Scalmani, G.; Barone, V. *J. Comput. Chem.* **2003**, *24*, 669.

### Gaussian 03, revision C.02

Frisch, M. J.; Trucks, G. W.; Schlegel, H. B.; Scuseria, G. E.; Robb, M. A.; Cheeseman, J. R.; Montgomery, Jr., J. A.; Vreven, T.; Kudin, K. N.; Burant, J. C.; Millam, J. M.; Iyengar, S. S.; Tomasi, J.; Barone, V.; Mennucci, B.; Cossi, M.; Scalmani, G.; Rega, N.; Petersson, G. A.; Nakatsuji, H.; Hada, M.; Ehara, M.; Toyota, K.; Fukuda, R.; Hasegawa, J.; Ishida, M.; Nakajima, T.; Honda, Y.; Kitao, O.; Nakai, H.; Klene, M.; Li, X.; Knox, J. E.; Hratchian, H. P.; Cross, J. B.; Bakken, V.; Adamo, C.; Jaramillo, J.; Gomperts, R.; Stratmann, R. E.; Yazyev, O.; Austin, A. J.; Cammi, R.; Pomelli, C.; Ochterski, J. W.; Ayala, P. Y.; Morokuma, K.; Voth, G. A.; Salvador, P.; Dannenberg, J. J.; Zakrzewski, V. G.; Dapprich, S.; Daniels, A. D.; Strain, M. C.; Farkas, O.; Malick, D. K.; Rabuck, A. D.; Raghavachari, K.; Foresman, J. B.; Ortiz, J. V.; Cui, Q.; Baboul, A. G.; Clifford, S.; Cioslowski, J.; Stefanov, B. B.; Liu, G.; Liashenko, A.; Piskorz, P.; Komaromi, I.; Martin, R. L.; Fox, D. J.; Keith, T.; Al-Laham, M. A.; Peng, C. Y.; Nanayakkara, A.; Challacombe, M.; Gill, P. M. W.; Johnson, B.; Chen, W.; Wong, M. W.; Gonzalez, C.; and Pople, J. A.; Gaussian, Inc., Wallingford CT, 2004.

### Gaussian 09, revision A.1

Frisch, M. J.; Trucks, G. W.; Schlegel, H. B.; Scuseria, G. E.; Robb, M. A.; Cheeseman, J. R.; Scalmani, G.; Barone, V.; Mennucci, B.; Petersson, G. A.; Nakatsuji, H.; Caricato, M.; Li, X.; Hratchian, H. P.; Izmaylov, A. F.; Bloino, J.; Zheng, G.; Sonnenberg, J. L.; Hada, M.; Ehara, M.; Toyota, K.; Fukuda, R.; Hasegawa, J.; Ishida, M.; Nakajima, T.; Honda, Y.; Kitao, O.; Nakai, H.; Vreven, T.; Montgomery, Jr., J. A.; Peralta, J. E.; Ogliaro, F.; Bearpark, M.; Heyd, J. J.; Brothers, E.; Kudin, K. N.; Staroverov, V. N.; Kobayashi, R.; Normand, J.; Raghavachari, K.; Rendell, A.; Burant, J. C.; Iyengar, S. S.; Tomasi, J.; Cossi, M.; Rega, N.; Millam, N. J.; Klene, M.; Knox, J. E.; Cross, J. B.; Bakken, V.; Adamo, C.; Jaramillo, J.; Gomperts, R.; Stratmann, R. E.; Yazyev, O.; Austin, A. J.; Cammi, R.; Pomelli, C.; Ochterski, J. W.; Martin, R. L.; Morokuma, K.; Zakrzewski, V. G.; Voth, G. A.; Salvador, P.; Dannenberg, J. J.; Dapprich, S.; Daniels, A. D.; Farkas, Ö.; Foresman, J. B.; Ortiz, J. V.; Cioslowski, J.; Fox, D. J. Gaussian, Inc., Wallingford CT, 2009.
